# Supplementary material
Source: PubMed Central journal article supplement (PMC3812417)

## A. Filtering the Variant calls to identify the Candidates

The full text of the GATK call used for the MSSM sample is shown below. Only loci found in the file `SureSelect_All_Exon_G3362_with_names_v2_hg19.nochr.bed` were searched for variants. The minimum mapping quality for a read to be included and the minimum base quality were both set at ten (Phred scale). This is a lenient threshold, allowing some lower quality reads to pass through, but this was motivated by the desire to avoid the possibility that blood/cell line disagreements (or mismatches) could be attributed to the use of too-stringent criteria at this stage.

Three initial filters were applied to the variant calls as follows:

1. The number of reads that covered the site was required to be at least 20 for both the blood and the cell line. Note that these counts exclude any reads that did not meet the quality thresholds described above.
2. The Phred-scaled likelihood for each of the calls was required to be at least 30. The genotyper returns a set of three “likelihoods,” one for each of the three possible genotypes at the locus (homozygous reference, heterozygous, homozygous alternative), expressed relative to the best fit. Hence, the best fit will have a score of 0, the other two will be positive, with larger values indicating more confidence in the call.
3. Each call is assigned a label of either “pass” or “low quality” by the genotyper; only those which “pass” are retained.

Any candidate that does not pass all three of these tests is excluded from further consideration.

The final step taken was to apply the GATK Variant Recalibrator to detect low-quality calls. This method can be summarized as follows: Using sites which are known to hold common variants (e.g., they are present in HapMap) a Gaussian mixture model was trained on a suite of quality metrics. The motivation behind this approach is that most of these calls will be correct, and that they will largely be of high quality, hence the quality metrics at these sites are reflective of what one would expect of those that yield correct calls. This model was then applied to the entire set of calls, and a score (the Variant Quality Score Log Odds, or VQSLOD) is assigned to each. The VQSLOD is interpreted as the log odds ratio that a true variant exists versus no variant. The commands used for the MSSM sample are shown in the Supplementary Material.

## B. Results of Filtering

Table 1 summarizes the results of the preliminary calls. The second row gives the number of loci for which at least one of the sequences yielded a non-reference call. For

instance, for the MSSM data, there are twelve variant call files (vcfs), two for each of the six subjects. There were 63,222 loci for which at least one of these twelve sequences was called a variant. This creates  $6 \times 63,222 = 379,332$  total blood/cell line pairs for which calls are made. (Calls are made even in the case the individual is homozygous reference.) Of these, 183,973 (48.5%) were such that either the blood or cell line call included a variant. This high percentage can be explained by the fact that many of these sites are common variants. Of these, 16,847 (9.2%) showed disagreement between the blood and cell line calls. The Vanderbilt subjects yielded similar percentages with 38,947 disagreements.

|                                                      | <b>MSSM</b> | <b>Vanderbilt</b> |
|------------------------------------------------------|-------------|-------------------|
| Number of Subjects                                   | 6           | 10                |
| Loci at which variant called on at least one subject | 63,222      | 75,232            |
| Blood or cell line called with non-reference base    | 183,973     | 327,728           |
| Number for which blood and cell line calls differ    | 16,847      | 38,947            |

**Table 1: Basic Properties of the Sample**

These  $16,847 + 38,947 = 55,794$  instances were then passed through the three first-level filters. Any candidate that did not pass all three of these tests was excluded from further consideration. There were 15,099 sites remaining after this step.

|                                                                        | <b>MSSM</b> | <b>Vanderbilt</b> |
|------------------------------------------------------------------------|-------------|-------------------|
| Number for which blood and cell line calls differed                    | 16,847      | 38,947            |
| Number for which depth was at least 20 on both blood and cell line     | 8,918       | 25,472            |
| Number for which Phred-scaled likelihood of both calls was at least 30 | 3,883       | 13,131            |
| Number characterized as a "PASS" by GATK                               | 15,590      | 36,199            |
| Number that satisfied all three criteria                               | 3,294       | 11,805            |

**Table 2: Basic filters applied to the calls.**

A larger percentage of the Vanderbilt calls survive this filter, in large part because overall depth for the Vanderbilt subjects was higher, and hence there was more confidence in the calls. If the same filters are applied to the cases of blood/cell line agreement, there are 806,233 pairs remaining implying a preliminary 1.8% disagreement rate.

## C. GATK Commands

The following is the command used to call the variants.

```
java -Xmx8g \  
  -jar /Users/Shared/GATK/GenomeAnalysisTK.jar \  
  -R /Users/Shared/References/ForGATK/b37/human_g1k_v37.fasta \  
  -T UnifiedGenotyper \  
  -I /Users/Shared/Autism/BloodCell/MSSM/BAMs/004ACL_markdup.bam \  
  -I /Users/Shared/Autism/BloodCell/MSSM/BAMs/004AC_markdup.bam \  
  -I /Users/Shared/Autism/BloodCell/MSSM/BAMs/007ACL_markdup.bam \  
  -I /Users/Shared/Autism/BloodCell/MSSM/BAMs/007AC_markdup.bam \  
  -I /Users/Shared/Autism/BloodCell/MSSM/BAMs/009ACL_markdup.bam \  
  -I /Users/Shared/Autism/BloodCell/MSSM/BAMs/009A_markdup.bam \  
  -I /Users/Shared/Autism/BloodCell/MSSM/BAMs/201ACL_markdup.bam \  
  -I /Users/Shared/Autism/BloodCell/MSSM/BAMs/201AC_markdup.bam \  
  -I /Users/Shared/Autism/BloodCell/MSSM/BAMs/8CL_markdup.bam \  
  -I /Users/Shared/Autism/BloodCell/MSSM/BAMs/8_markdup.bam \  
  -I /Users/Shared/Autism/BloodCell/MSSM/BAMs/9CL_markdup.bam \  
  -I /Users/Shared/Autism/BloodCell/MSSM/BAMs/9_markdup.bam \  
  -L  
/Users/Shared/ExonBEDfiles/SureSelect_All_Exon_G3362_with_names_v2_hg19.nochr.b  
ed \  
  -B:dbsnp,VCF /Users/Shared/dbSNPdatabase/dbsnp_132.b37.vcf \  
  -A AlleleBalance \  
  -A DepthOfCoverage \  
  -A FisherStrand \  
  -A LowMQ \  
  -A ReadPosRankSumTest \  
  -BTIMR UNION \  
  -glm SNP \  
  -nt 7 \  
  -im ALL \  
  -gt_mode DISCOVERY \  
  -hets 0.001 \  
  -mmq 10 \  
  -stand_call_conf 20.0 -stand_emit_conf 10.0 -dcov 500 \  
  --min_base_quality_score 10 \  
  -l INFO \  
  -log MSSM_BloodCell.raw.log \  
  -o ./MSSM_BloodCell.raw.vcf
```

The following is the command used to construct the Gaussian mixture model.

```
java -Xmx8g \  
  -jar /Users/Shared/GATK/GenomeAnalysisTK.jar \  
  -T VariantRecalibrator \  
  -R /Users/Shared/References/ForGATK/b37/human_g1k_v37.fasta \  
  -L
```

```

-B:input,VCF ./MSSM_BloodCell.raw.vcf \
-B:dbsnp,VCF,known=true,training=false,truth=false,prior=8.0 \
  /Users/Shared/dbsnpdatabase/dbsnp_132.b37.vcf \
-B:hapmap,VCF,known=false,training=true,truth=true,prior=15.0 \
  /Users/Shared/GATK/HapMap/hapmap_3.3.b37.vcf \
-B:omni,VCF,known=false,training=true,truth=false,prior=12.0 \
  /Users/Shared/GATK/Omni/1000G_omni2.5.b37.vcf \
-an QD \
-an HaplotypeScore \
-an MQRankSum \
-an ReadPosRankSum \
-an FS \
-an MQ \
-nt 8 \
--maxGaussians 6 \
-mode SNP \
-log ./MSSM_BloodCell.Recal.log \
-recalFile ./MSSM_BloodCell.Recal.recal \
-tranchesFile ./MSSM_BloodCell.Recal.tranches \
-rscriptFile ./MSSM_BloodCell.Recal.R

```

The following is the command used to apply the Gaussian mixture model to the observed variants, in order to obtain the VQSL0D scores.

```

java -Xmx8g \
-jar /Users/Shared/GATK/GenomeAnalysisTK.jar \
-T ApplyRecalibration \
-R /Users/Shared/References/ForGATK/b37/human_g1k_v37.fasta \
-B:input,VCF ./MSSM_BloodCell.raw.vcf \
-recalFile ./MSSM_BloodCell.Recal.recal \
-tranchesFile ./MSSM_BloodCell.Recal.tranches \
-ts_filter_level 99.0 \
-log ./MSSM_BloodCell.ApplyRecal.log \
-o ./MSSM_BloodCell.Recal.vcf

```

## D. Detailed Validation Results

| Indiv. | Chr. | Position  | Blood Call  | Validation | Cell Call   | Validation | Comment |
|--------|------|-----------|-------------|------------|-------------|------------|---------|
| 3      | X    | 90691093  | AAC[C/C]GCC | TRUE       | AAC[C/T]GCC | TRUE       | MOSAIC  |
| 6      | X    | 123538932 | CCT[C/C]TGC | TRUE       | CCT[C/T]TGC | TRUE       | MOSAIC  |
| 7      | 4    | 123533877 | TTC[A/A]CTT | TRUE       | TTC[A/G]CTT | TRUE       | MOSAIC  |
| 11     | 2    | 228882979 | ACC[G/G]TTG | TRUE       | ACC[G/A]TTG | TRUE       | MOSAIC  |
| 11     | 8    | 42256366  | AAA[T/T]CTC | TRUE       | AAA[T/A]CTC | TRUE       | MOSAIC  |
| 12     | 6    | 131188570 | GCT[C/C]GAA | TRUE       | GCT[C/T]GAA | TRUE       | MOSAIC  |
| 12     | 20   | 13846164  | CTG[T/T]ACA | TRUE       | CTG[T/G]ACA | TRUE       | MOSAIC  |

|    |    |           |             |      |             |      |        |
|----|----|-----------|-------------|------|-------------|------|--------|
| 16 | 1  | 167403251 | AAC[A/A]CTC | TRUE | AAC[A/G]CTC | TRUE | MOSAIC |
| 16 | 12 | 109684116 | CTG[C/C]GGG | TRUE | CTG[C/T]GGG | TRUE | MOSAIC |
| 16 | 18 | 58038892  | TGC[C/C]GGG | TRUE | TGC[C/T]GGG | TRUE | MOSAIC |

**Table 3: Group 0 Validation Results**

| Indiv. | Chr. | Position  | Blood Call  | Validation | Cell Call   | Validation | Comment                                                         |
|--------|------|-----------|-------------|------------|-------------|------------|-----------------------------------------------------------------|
| 1      | 4    | 69180008  | GAC[G/G]AAG | TRUE       | GAC[G/A]AAG | TRUE       | MOSAIC                                                          |
| 4      | 1    | 10706375  | AGG[C/C]AAG | TRUE       | AGG[C/A]AAG | TRUE       | MOSAIC                                                          |
| 4      | 6    | 32629194  | AAC[G/G]CCA |            | AAC[G/A]CCA |            | Impossible primer design.                                       |
| 4      | 6    | 32629199  | CAC[T/T]CAG |            | CAC[T/C]CAG |            | Impossible primer design.                                       |
| 4      | 10   | 98078170  | CTT[C/C]AAG | TRUE       | CTT[C/T]AAG | FALSE      | All "C" reads on forward strand.                                |
| 4      | 11   | 47644317  | CAT[C/C]CAC | TRUE       | CAT[C/A]CAC | TRUE       | MOSAIC                                                          |
| 4      | 11   | 56143156  | AGA[C/C]CAT | TRUE       | AGA[C/T]CAT | FALSE      | Possibly an alignment problem? Note next candidate is adjacent. |
| 4      | 11   | 56143158  | ACC[A/A]TCA | TRUE       | ACC[A/G]TCA | FALSE      | See previous.                                                   |
| 4      | 12   | 57662804  | CTG[C/C]TGG | TRUE       | CTG[C/G]TGG | FALSE      | All "G" reads on the forward strand.                            |
| 4      | 12   | 77424135  | TAA[C/T]GAA | FALSE      | TAA[C/C]GAA | TRUE       | Almost all reads on the reverse strand.                         |
| 4      | 22   | 50553671  | GAC[G/G]GAA | TRUE       | GAC[G/T]GAA | FALSE      | All "T" reads on the reverse strand.                            |
| 4      | X    | 55249176  | GAA[G/G]CAG | TRUE       | GAA[G/A]CAG | TRUE       | MOSAIC                                                          |
| 5      | 11   | 67378012  | CCC[G/T]CCT | FALSE      | CCC[G/G]CCT | TRUE       | All "T" reads on reverse strand.                                |
| 5      | 16   | 89246670  | GGA[T/T]GAG | TRUE       | GGA[T/C]GAG | FALSE      | All but one "C" read is highly skewed.                          |
| 6      | X    | 99661793  | TCG[G/G]CCA | TRUE       | TCG[G/A]CCA | TRUE       | MOSAIC                                                          |
| 6      | X    | 118767373 | GGA[C/C]GAA | TRUE       | GGA[C/T]GAA | TRUE       | MOSAIC                                                          |
| 7      | 12   | 54803111  | GTG[C/C]GCC | TRUE       | GTG[C/T]GCC | TRUE       | MOSAIC                                                          |
| 7      | 20   | 210435    | ACT[C/C]CAA | TRUE       | ACT[C/T]CAA | TRUE       | MOSAIC                                                          |
| 8      | 5    | 137801559 | GAG[G/G]AGA | TRUE       | GAG[G/C]AGA | TRUE       | MOSAIC                                                          |
| 8      | 9    | 119106793 | CTC[C/C]TTC | TRUE       | CTC[C/T]TTC | TRUE       | MOSAIC                                                          |
| 9      | 2    | 198299652 | TTA[G/G]GCT | TRUE       | TTA[G/C]GCT | TRUE       | MOSAIC, but noisy background                                    |
| 9      | 11   | 134241679 | AAT[C/C]GTG | TRUE       | AAT[C/T]GTG | TRUE       | MOSAIC                                                          |
| 11     | 2    | 116599816 | ATC[T/T]GAG | TRUE       | ATC[T/G]GAG | TRUE       | MOSAIC                                                          |
| 11     | 7    | 72397315  | ACA[G/G]CTA | TRUE       | ACA[G/A]CTA | TRUE       | MOSAIC (very small additional peak)                             |
| 11     | 19   | 56300185  | TTA[A/A]GTA | TRUE       | TTA[A/G]GTA | TRUE       | MOSAIC                                                          |
| 12     | 11   | 27389932  | TTT[C/C]GGG | TRUE       | TTT[C/T]GGG | TRUE       | MOSAIC                                                          |
| 15     | 11   | 116797981 | AGC[T/T]TTT | TRUE       | AGC[T/C]TTT | TRUE       | MOSAIC                                                          |
| 16     | 11   | 18313224  | GTC[G/G]TTC | TRUE       | GTC[G/T]TTC | TRUE       | MOSAIC                                                          |

**Table 4: Group 1 Validation Results**

| Indiv. | Chr. | Position  | Blood Call  | Validation | Cell Call   | Validation | Comment                                                                                                                                       |
|--------|------|-----------|-------------|------------|-------------|------------|-----------------------------------------------------------------------------------------------------------------------------------------------|
| 1      | 1    | 65313240  | GGG[T/T]CTA | TRUE       | GGG[T/G]CTA | FALSE      | All "G" reads on the forward strand, and these reads are skewed.                                                                              |
| 1      | 3    | 122354873 | ACA[C/C]GAT | TRUE       | ACA[C/T]GAT | TRUE       | MOSAIC                                                                                                                                        |
| 1      | 4    | 46264063  | GTC[C/C]ATG | TRUE       | GTC[C/A]ATG | FALSE      | Large total depth, and very few "A" reads on cell line.                                                                                       |
| 1      | 9    | 135982045 | CTT[C/C]CCA | TRUE       | CTT[C/T]CCA | FALSE      | All "T" reads on the forward strand.                                                                                                          |
| 1      | 11   | 62378536  | CCG[C/A]CAC | FALSE      | CCG[C/C]CAC | TRUE       | Blood "A" reads are skewed, and few.                                                                                                          |
| 1      | 12   | 132623810 | GAG[C/A]CCC | FALSE      | GAG[C/C]CCC | TRUE       | Blood "A" reads are skewed, and few.                                                                                                          |
| 1      | 17   | 78931437  | GGT[G/G]GTG | TRUE       | GGT[G/T]GTG | FALSE      | The forward "T" reads are skewed to the left, the reverse "T" reads are skewed to the right.                                                  |
| 1      | 19   | 15278133  | TGG[T/T]GCC | TRUE       | TGG[T/G]GCC | FALSE      | All "G" reads are on the forward strand.                                                                                                      |
| 1      | 19   | 51958638  | AGG[T/T]GTG | TRUE       | AGG[T/G]GTG | FALSE      | All "G" reads are on the forward strand.                                                                                                      |
| 1      | 20   | 3928845   | GGG[A/A]AAA | TRUE       | GGG[A/G]AAA | FALSE      | All but one "G" read is on the forward strand, and are highly skewed.                                                                         |
| 1      | 20   | 61459302  | CCC[G/G]GAG | TRUE       | CCC[G/T]GAG | FALSE      | The forward "T" reads are skewed to the left, the reverse "T" reads are skewed to the right.                                                  |
| 1      | Y    | 14958873  | TCC[C/C]CAA | TRUE       | TCC[C/T]CAA | TRUE       | MOSAIC                                                                                                                                        |
| 2      | 7    | 44613258  | CGA[G/G]CCA | TRUE       | CGA[G/T]CCA | FALSE      | All "T" reads are skewed, and there are few.                                                                                                  |
| 2      | 9    | 8484293   | TAT[G/G]ATT | TRUE       | TAT[G/T]ATT | FALSE      | Low proportion of "T" reads on cell line, and almost all are skewed.                                                                          |
| 2      | 9    | 101498842 | TGG[C/A]ACT | FALSE      | TGG[C/C]ACT | TRUE       | The forward "A" reads are skewed to the left, the reverse "A" reads are skewed to the right.                                                  |
| 2      | 9    | 101498847 | CTG[C/A]TCT | FALSE      | CTG[C/C]TCT | TRUE       | The forward "A" reads are skewed to the left, the reverse "A" reads are skewed to the right. Also, note proximity to previous.                |
| 2      | 18   | 63511013  | AAC[C/C]GGT | TRUE       | AAC[C/T]GGT | TRUE       | MOSAIC                                                                                                                                        |
| 2      | 19   | 54725995  | GCT[A/A]TAG | FALSE      | GCT[G/A]TAG | TRUE       | This appears to be a mosaic on both blood and cell line. Large imbalance in "A" versus "G" calls, but consistent between blood and cell line. |
| 2      | 21   | 35169715  | TGG[A/A]GCA | TRUE       | TGG[A/G]GCA | FALSE      | All "G" reads are on the forward strand.                                                                                                      |
| 2      | X    | 10107414  | AAT[C/C]AAT | TRUE       | AAT[C/A]AAT | FALSE      | All "A" reads are on the forward strand.                                                                                                      |

|   |    |           |             |       |             |       |         |
|---|----|-----------|-------------|-------|-------------|-------|---------|
| 3 | 1  | 2441539   | TGA[G/G]GGA | TRUE  | TGA[G/A]GGA | FALSE |         |
| 3 | 1  | 27995021  | GTC[C/A]GAG | FALSE | GTC[C/C]GAG | TRUE  |         |
| 3 | 15 | 75970085  | GCA[G/T]CCT | FALSE | GCA[G/G]CCT | TRUE  |         |
| 3 | 17 | 33459447  | CTT[C/C]GGG | TRUE  | CTT[C/T]GGG | FALSE |         |
| 3 | 19 | 55148043  | GTC[T/T]GGG | TRUE  | GTC[T/C]GGG | FALSE |         |
| 3 | 21 | 33077817  | TTA[C/C]TTA | TRUE  | TTA[C/T]TTA | FALSE |         |
| 4 | 1  | 16748468  | CTC[T/T]GGA | TRUE  | CTC[T/G]GGA | FALSE |         |
| 4 | 1  | 35870652  | TGG[A/A]GCC | TRUE  | TGG[A/G]GCC | FALSE |         |
| 4 | 1  | 46499441  | TCC[A/A]GCT | TRUE  | TCC[A/C]GCT | FALSE |         |
| 4 | 1  | 57398975  | CTT[C/C]CAC | TRUE  | CTT[C/T]CAC | FALSE |         |
| 4 | 1  | 94461686  | TCC[A/A]GCA | TRUE  | TCC[A/C]GCA | FALSE |         |
| 4 | 2  | 11780500  | CAG[T/T]TCC | TRUE  | CAG[T/G]TCC | FALSE |         |
| 4 | 2  | 242204025 | TGG[A/A]CCA | TRUE  | TGG[A/C]CCA | FALSE |         |
| 4 | 5  | 43173577  | GTT[C/C]TTA | TRUE  | GTT[C/T]TTA | FALSE |         |
| 4 | 6  | 11735807  | CTG[A/A]TGT | TRUE  | CTG[A/G]TGT | FALSE |         |
| 4 | 6  | 32632795  | CTC[C/C]GTC | TRUE  | CTC[C/T]GTC | FALSE |         |
| 4 | 6  | 32632850  | GCG[G/G]GGA | TRUE  | GCG[G/A]GGA | FALSE |         |
| 4 | 6  | 32634318  | TCG[C/C]CAG |       | TCG[C/A]CAG |       | Failure |
| 4 | 7  | 6461451   | CGT[T/T]GCA | TRUE  | CGT[T/G]GCA | FALSE |         |
| 4 | 7  | 44151241  | CTG[T/T]GGG | TRUE  | CTG[T/G]GGG | FALSE |         |
| 4 | 8  | 2020398   | GCC[C/C]TGA | TRUE  | GCC[C/A]TGA | FALSE |         |
| 4 | 9  | 100315518 | CTG[T/T]TCC | TRUE  | CTG[T/G]TCC | FALSE |         |
| 4 | 10 | 94822655  | TGG[A/A]CGA | TRUE  | TGG[A/G]CGA | FALSE |         |
| 4 | 10 | 97397146  | TCC[A/A]CTG | TRUE  | TCC[A/C]CTG | FALSE |         |
| 4 | 10 | 103772671 | CAG[T/T]AGC | TRUE  | CAG[T/C]AGC | TRUE  | MOSAIC  |
| 4 | 11 | 68131385  | AGG[T/T]GCT | TRUE  | AGG[T/G]GCT | FALSE |         |
| 4 | 11 | 116706900 | TCC[A/A]CCT | TRUE  | TCC[A/C]CCT | FALSE |         |
| 4 | 13 | 21063460  | GGG[A/A]GAC | TRUE  | GGG[A/G]GAC | FALSE |         |
| 4 | 14 | 23564357  | CTT[C/C]GGG | TRUE  | CTT[C/T]GGG | FALSE |         |
| 4 | 14 | 23867949  | CAG[T/T]TGC | TRUE  | CAG[T/G]TGC | FALSE |         |
| 4 | 14 | 54416937  | TGG[T/T]CAG | TRUE  | TGG[T/C]CAG | FALSE |         |
| 4 | 14 | 57085352  | CCG[T/T]CCT | TRUE  | CCG[T/G]CCT | FALSE |         |
| 4 | 16 | 2498902   | CTC[A/A]CGG | TRUE  | CTC[A/C]CGG | FALSE |         |
| 4 | 16 | 4445265   | CCC[A/A]CCC | TRUE  | CCC[A/C]CCC | FALSE |         |

|    |    |           |             |       |             |       |         |
|----|----|-----------|-------------|-------|-------------|-------|---------|
| 4  | 17 | 7707597   | AGG[A/A]GCT | TRUE  | AGG[A/G]GCT | FALSE |         |
| 4  | 17 | 21319369  | ACC[G/G]AGG | TRUE  | ACC[G/A]AGG | FALSE |         |
| 4  | 19 | 313490    | CCC[A/A]CCT | TRUE  | CCC[A/C]CCT | FALSE |         |
| 4  | 19 | 44252108  | CCC[T/T]CCT | TRUE  | CCC[T/C]CCT | FALSE |         |
| 4  | 19 | 50322605  | GTG[A/A]ATG | TRUE  | GTG[A/C]ATG | FALSE |         |
| 4  | 20 | 47592567  | CTC[A/A]CGG | TRUE  | CTC[A/C]CGG | FALSE |         |
| 4  | 21 | 46640865  | AGC[T/T]GGG | TRUE  | AGC[T/G]GGG | FALSE |         |
| 5  | 3  | 179527471 | AAA[G/A]AAG | TRUE  | AAA[G/G]AAG | FALSE |         |
| 5  | 5  | 140079996 | TCC[A/C]AGC | FALSE | TCC[A/A]AGC | TRUE  |         |
| 5  | 5  | 148712424 | CAA[G/G]CCC | TRUE  | CAA[G/T]CCC | FALSE |         |
| 5  | 6  | 7405175   | TAT[C/C]ATT | TRUE  | TAT[C/A]ATT | FALSE |         |
| 5  | 7  | 66648157  | GAA[C/T]GTG | TRUE  | GAA[T/T]GTG | FALSE |         |
| 5  | 11 | 117789342 | GCC[T/C]GGG | TRUE  | GCC[T/T]GGG | FALSE |         |
| 5  | 11 | 117789345 | TGG[G/C]CTG | TRUE  | TGG[G/G]CTG | FALSE |         |
| 5  | 15 | 43712957  | GGA[G/A]AAG | FALSE | GGA[G/G]AAG | TRUE  |         |
| 5  | 20 | 62658494  | CGG[G/A]AAG | FALSE | CGG[G/G]AAG | TRUE  |         |
| 6  | 6  | 32632598  | CGG[A/T]ACG |       | CGG[A/A]ACG |       | Failure |
| 6  | 16 | 135354    | GAG[G/T]ACA | FALSE | GAG[G/G]ACA | TRUE  |         |
| 6  | 22 | 24583727  | GTG[G/C]CAG | FALSE | GTG[G/G]CAG | TRUE  |         |
| 7  | 9  | 4663267   | CAC[C/C]ATC | TRUE  | CAC[C/A]ATC | TRUE  | MOSAIC  |
| 7  | 9  | 72006567  | CTC[G/G]CGG | TRUE  | CTC[G/A]CGG | TRUE  | MOSAIC  |
| 7  | 9  | 87425462  | TTT[G/G]TTT | TRUE  | TTT[G/A]TTT | TRUE  | MOSAIC  |
| 7  | 10 | 15138591  | CGA[C/C]TTT | TRUE  | CGA[C/T]TTT | TRUE  | MOSAIC  |
| 7  | 22 | 42912029  | CTT[G/G]GGA | TRUE  | CTT[G/T]GGA | FALSE |         |
| 8  | 1  | 54360125  | AGC[G/G]ACT | TRUE  | AGC[G/A]ACT | TRUE  | MOSAIC  |
| 8  | 11 | 63672427  | GTG[A/C]CCC | TRUE  | GTG[A/A]CCC | FALSE |         |
| 8  | 20 | 10036141  | TTT[C/T]TTT | TRUE  | TTT[C/C]TTT | FALSE |         |
| 9  | 2  | 130912789 | CAA[A/A]CAA | TRUE  | CAA[A/C]CAA | FALSE |         |
| 9  | 5  | 840785    | GAG[C/A]CAC | TRUE  | GAG[C/C]CAC | FALSE |         |
| 9  | 6  | 75823294  | CAT[G/G]TGC | TRUE  | CAT[G/A]TGC | TRUE  | MOSAIC  |
| 9  | 11 | 2416725   | AGG[C/C]TGT | TRUE  | AGG[C/A]TGT | FALSE |         |
| 9  | 15 | 48459567  | ATC[C/C]TTA | TRUE  | ATC[C/T]TTA | TRUE  | MOSAIC  |
| 10 | 1  | 68942568  | CTT[C/T]ATT | TRUE  | CTT[C/C]ATT | FALSE |         |
| 10 | 5  | 60241142  | GAA[A/A]GAG | TRUE  | GAA[G/A]GAG | FALSE |         |



|    |    |           |             |       |             |       |                                       |
|----|----|-----------|-------------|-------|-------------|-------|---------------------------------------|
| 10 | 7  | 128483043 | TGC[A/C]CCT | TRUE  | TGC[A/A]CCT | FALSE |                                       |
| 10 | 10 | 3174669   | CTC[A/A]CCG |       | CTC[A/C]CCG |       | Failure                               |
| 10 | 19 | 46375892  | GCC[A/A]GAA | TRUE  | GCC[A/G]GAA | FALSE |                                       |
| 11 | 1  | 12921127  | ATT[A/G]GAA | TRUE  | ATT[A/A]GAA | FALSE | All G calls are in a single direction |
| 11 | 2  | 139318349 | AAC[A/A]TTT | TRUE  | AAC[A/T]TTT | FALSE | All T calls are in a single direction |
| 11 | 3  | 48464209  | AAG[C/C]GAT | TRUE  | AAG[C/T]GAT | TRUE  | MOSAIC                                |
| 12 | 3  | 100091564 | GCG[G/T]TAC | FALSE | GCG[G/G]TAC | TRUE  | All T calls are in a single direction |
| 12 | 4  | 155506864 | CAC[G/G]GGA | TRUE  | CAC[G/A]GGA | TRUE  | MOSAIC                                |
| 12 | 10 | 117825111 | GCC[C/C]GAC | TRUE  | GCC[C/T]GAC | TRUE  | All T calls are in a single direction |
| 12 | 19 | 33467325  | TTC[A/A]TTG | TRUE  | TTC[A/G]TTG | TRUE  | MOSAIC                                |
| 13 | 17 | 21318770  | CGC[G/A]GCG | FALSE | CGC[G/G]GCG | TRUE  | All A calls are in a single direction |
| 13 | 17 | 21318773  | GGC[G/A]CAG | FALSE | GGC[G/G]CAG | TRUE  | All A calls are in a single direction |
| 14 | 7  | 26251843  | GTT[C/T]TTT | FALSE | GTT[C/C]TTT | TRUE  | Very slight bump for T on blood       |
| 14 | 15 | 20588693  | CAA[C/C]ATC | FALSE | CAA[C/T]ATC | TRUE  | Appears to be mosaic on both          |
| 15 | 14 | 96180232  | AAG[C/C]TCC | TRUE  | AAG[C/T]TCC | FALSE | All T calls are in a single direction |
| 16 | 3  | 48505302  | GGC[A/A]TCT | TRUE  | GGC[A/G]TCT | FALSE | No clear explanation for mistake      |
| 16 | 6  | 151334926 | TGG[T/T]GTT | TRUE  | TGG[T/G]GTT | FALSE | All G calls are in a single direction |
| 16 | 11 | 19251484  | TGG[T/T]TTG | TRUE  | TGG[T/G]TTG | TRUE  | MOSAIC                                |
| 16 | 14 | 81223208  | ACA[A/A]TAA | TRUE  | ACA[A/C]TAA | FALSE | All C calls are in a single direction |

**Table 5: Group 2 Validation Results**

| Indiv. | Chr. | Position  | Blood Call  | Validation | Cell Call       | Validation | Comment                   |
|--------|------|-----------|-------------|------------|-----------------|------------|---------------------------|
| 1      | 7    | 44099733  | TGC[C/C]CTG | TRUE       | TGC[C/A]CTG     | FALSE      | Strong Candidate          |
| 1      | 20   | 1895794   | CGT[G/G]TTG |            | CGT[G/A]TTG     |            | Strong Candidate; Failure |
| 1      | 20   | 1895797   | GTT[G/G]GTT |            | GTT[G/A]GTT     |            | Strong Candidate; Failure |
| 2      | 1    | 185137463 | TAT[T/T]TAT |            | TAT[T/A]TAT     |            | Strong Candidate; Failure |
| 2      | 3    | 16264288  | AGA[G/G]CCT | TRUE       | AGA[G/T]CCT     | FALSE      | Strong Candidate          |
| 2      | 7    | 912157    | CAC[G/G]TAT | TRUE       | CAC[G/T]TAT     | FALSE      | Strong Candidate          |
| 2      | 8    | 73480055  | TCC[G/G]GAG | TRUE       | TCC[G/A]GAG     | FALSE      | Strong Candidate          |
| 3      | 1    | 240371031 | AGC[A/A]GGA |            | AGC[A/G]GG<br>A |            | Strong Candidate; Failure |
| 4      | 5    | 115230799 | ACA[T/T]TAG | TRUE       | ACA[T/A]TAG     | FALSE      | Strong Candidate          |
| 4      | 5    | 115230800 | CAT[T/T]AGA | TRUE       | CAT[T/C]AGA     | FALSE      | Strong Candidate          |
| 4      | 6    | 32712996  | AGT[A/A]CAC | TRUE       | AGT[A/T]CAC     | FALSE      | Strong Candidate          |
| 4      | X    | 154721357 | AAA[C/C]AGA |            | AAA[G/C]AGA     |            | Strong Candidate; Failure |
| 5      | 6    | 148861617 | CTC[G/G]TTG | TRUE       | CTC[G/A]TTG     | TRUE       | Strong Candidate; MOSAIC  |

|    |    |           |             |       |             |       |                              |
|----|----|-----------|-------------|-------|-------------|-------|------------------------------|
| 6  | 19 | 51919894  | CAC[A/A]CCC | TRUE  | CAC[A/G]CCC | FALSE | Strong Candidate             |
| 7  | 19 | 54942009  | CAG[C/C]GAG |       | CAG[C/A]GAG |       | Strong Candidate;<br>Failure |
| 8  | 12 | 51740409  | CCA[T/T]AAA |       | CCA[T/G]AAA |       | Strong Candidate;<br>Failure |
| 8  | 12 | 51740410  | CAT[A/A]AAG |       | CAT[A/G]AAG |       | Strong Candidate;<br>Failure |
| 9  | 6  | 32609368  | CTT[A/A]AGT |       | CTT[A/G]AGT |       | Strong Candidate;<br>Failure |
| 9  | 8  | 28651299  | CAA[A/A]AAA | TRUE  | CAA[A/C]AAA | FALSE | Strong Candidate             |
| 11 | 2  | 27840357  | TGG[A/G]AAA | FALSE | TGG[A/A]AAA | TRUE  |                              |
| 11 | 3  | 10114944  | GAA[A/C]CAA | FALSE | GAA[A/A]CAA | TRUE  |                              |
| 11 | 5  | 180335598 | AGG[T/T]GTT | TRUE  | AGG[T/G]GTT | FALSE |                              |
| 12 | 4  | 72319317  | CAT[T/T]TAT | TRUE  | CAT[T/G]TAT | TRUE  | Strong Candidate;<br>MOSAIC  |
| 12 | 16 | 88926388  | GCC[C/C]TAC | TRUE  | GCC[C/T]TAC | FALSE |                              |
| 16 | 1  | 15808767  | TCC[G/G]GGA |       | TCC[G/A]GGA |       | Strong Candidate;<br>Failure |
| 16 | 1  | 202743892 | ATC[T/T]CAT | TRUE  | ATC[T/C]CAT | FALSE |                              |
| 16 | 5  | 120022221 | GAT[T/T]CCT | TRUE  | GAT[T/C]CCT | TRUE  | Strong Candidate;<br>MOSAIC  |
| 16 | 7  | 99361466  | GTA[T/T]CAT | TRUE  | GTA[C/T]CAT | FALSE |                              |
| 16 | 8  | 7718187   | AAT[T/G]AGA | TRUE  | AAT[G/G]AGA | FALSE |                              |
| 16 | 8  | 87229948  | CGA[A/A]GAT |       | CGA[T/A]GAT |       | Strong Candidate;<br>Failure |
| 16 | 9  | 135153668 | CAA[T/T]AGT | TRUE  | CAA[C/T]AGT | FALSE |                              |
| 16 | 19 | 52249211  | AAC[G/G]CCA | TRUE  | AAC[T/G]CCA | FALSE | Strong Candidate             |
| 16 | 21 | 15516948  | TTT[T/T]TGG | TRUE  | TTT[C/T]TGG | FALSE |                              |

**Table 6: Group 3 Validation Results**

## E. Pileup Diagrams of Group 0 Candidates

The plots on the following pages illustrate the sequencing results for the ten Group 0 Candidates. To read these plots: The range of bases spanned by a read is depicted as a horizontal line. The color of that line indicates the direction of the strand to which the read mapped: red indicates a read on the forward strand, blue is on the reverse. The vertical line passes through the target locus.

Individual: 3, Chromosome: X, Position: 90691093

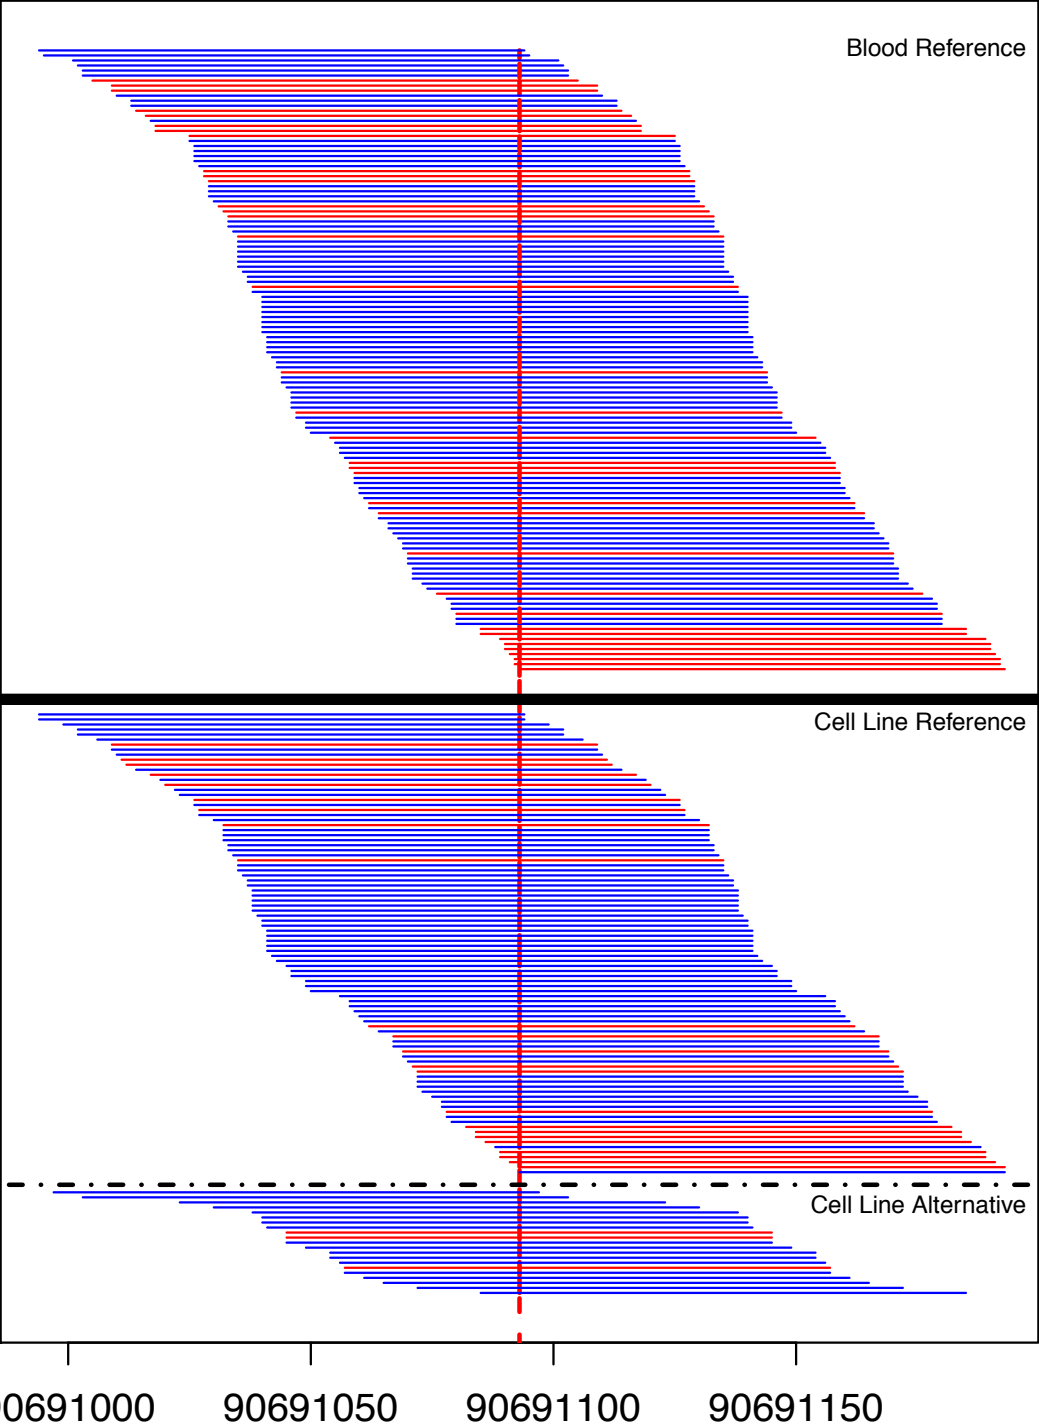

Position on Chromosome X

Individual: 6, Chromosome: X, Position: 123538932

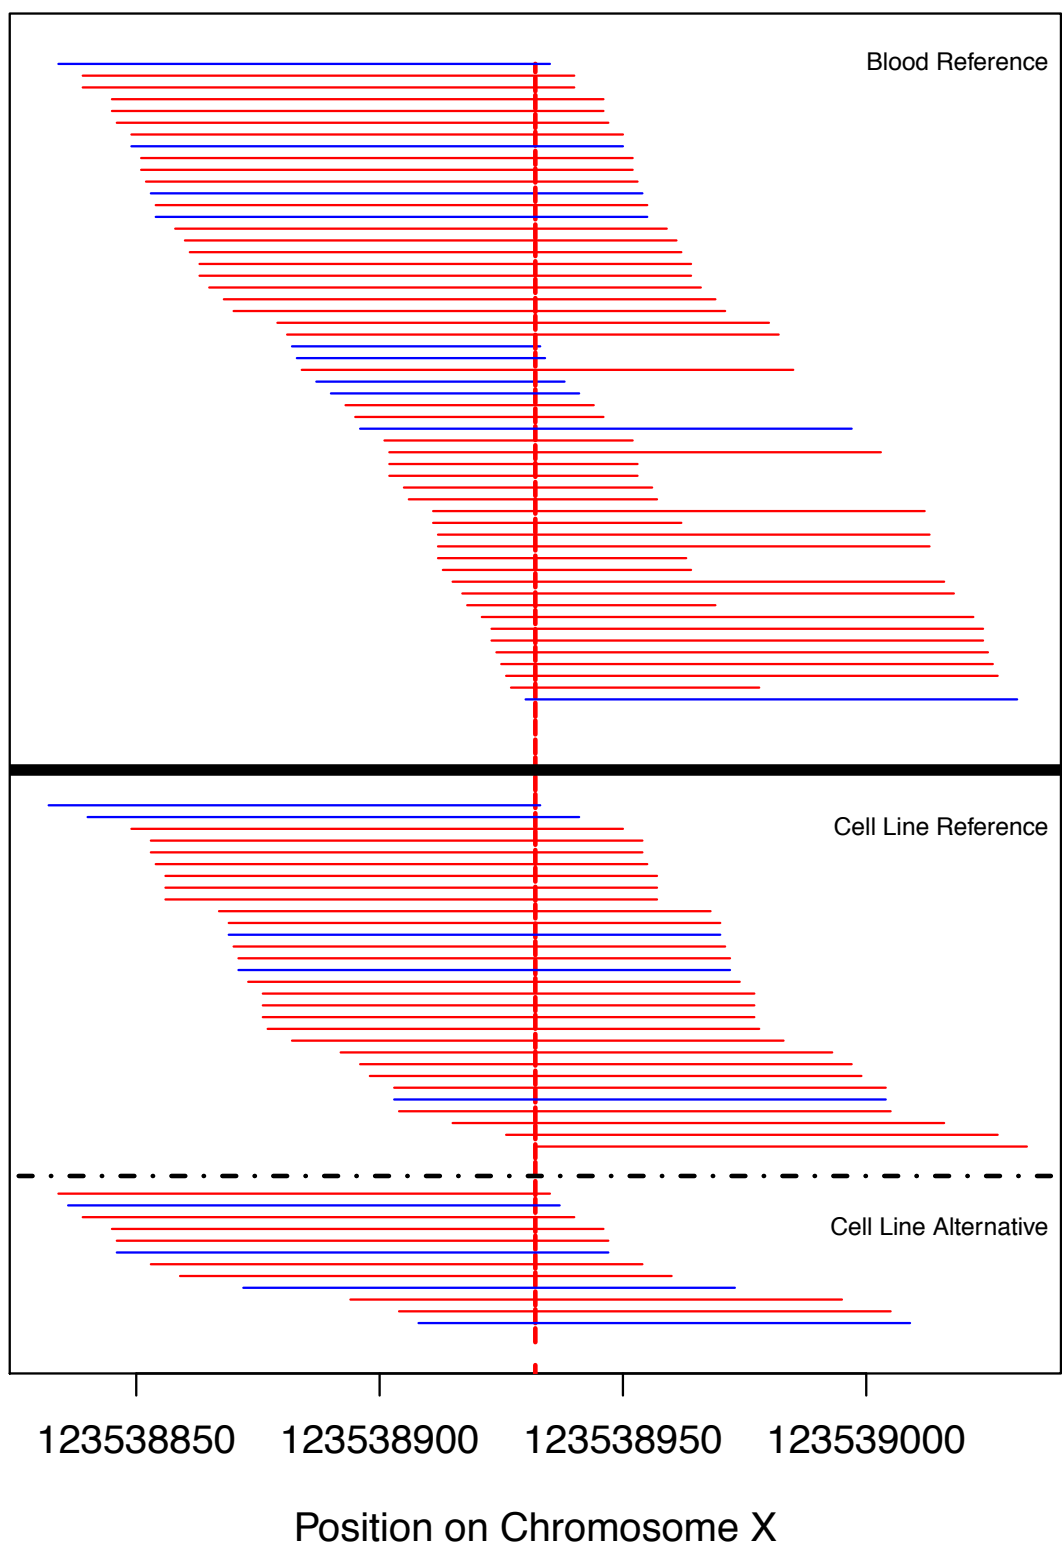

Individual: 7, Chromosome: 4, Position: 123533877

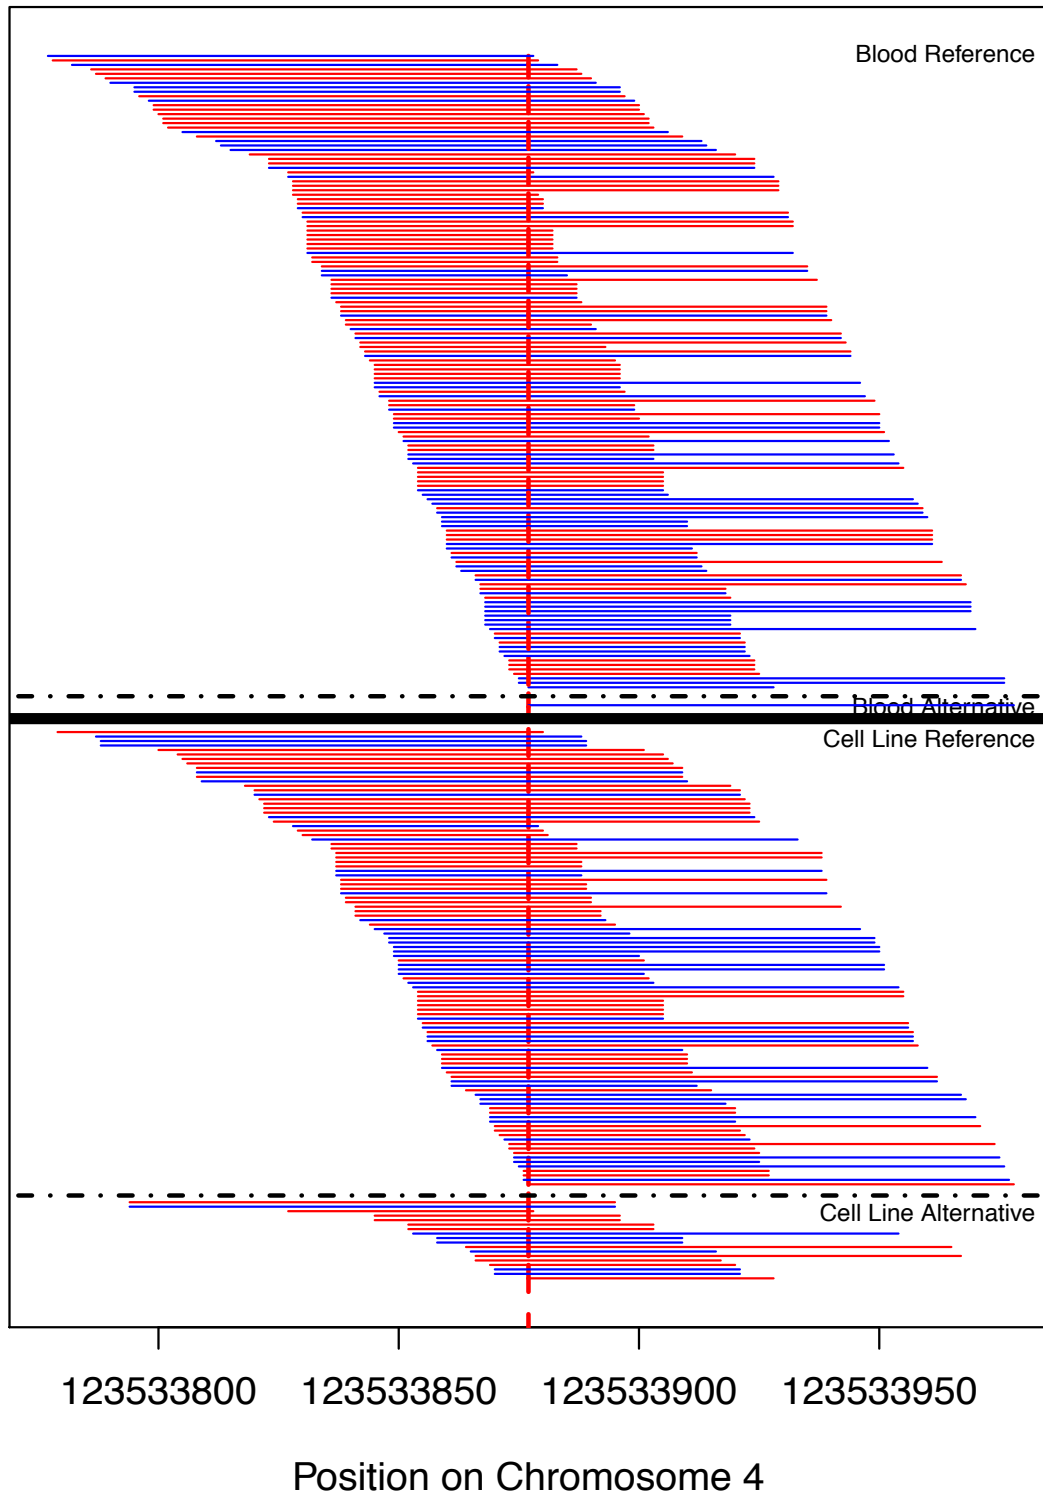

Individual: 11, Chromosome: 8, Position: 42256366

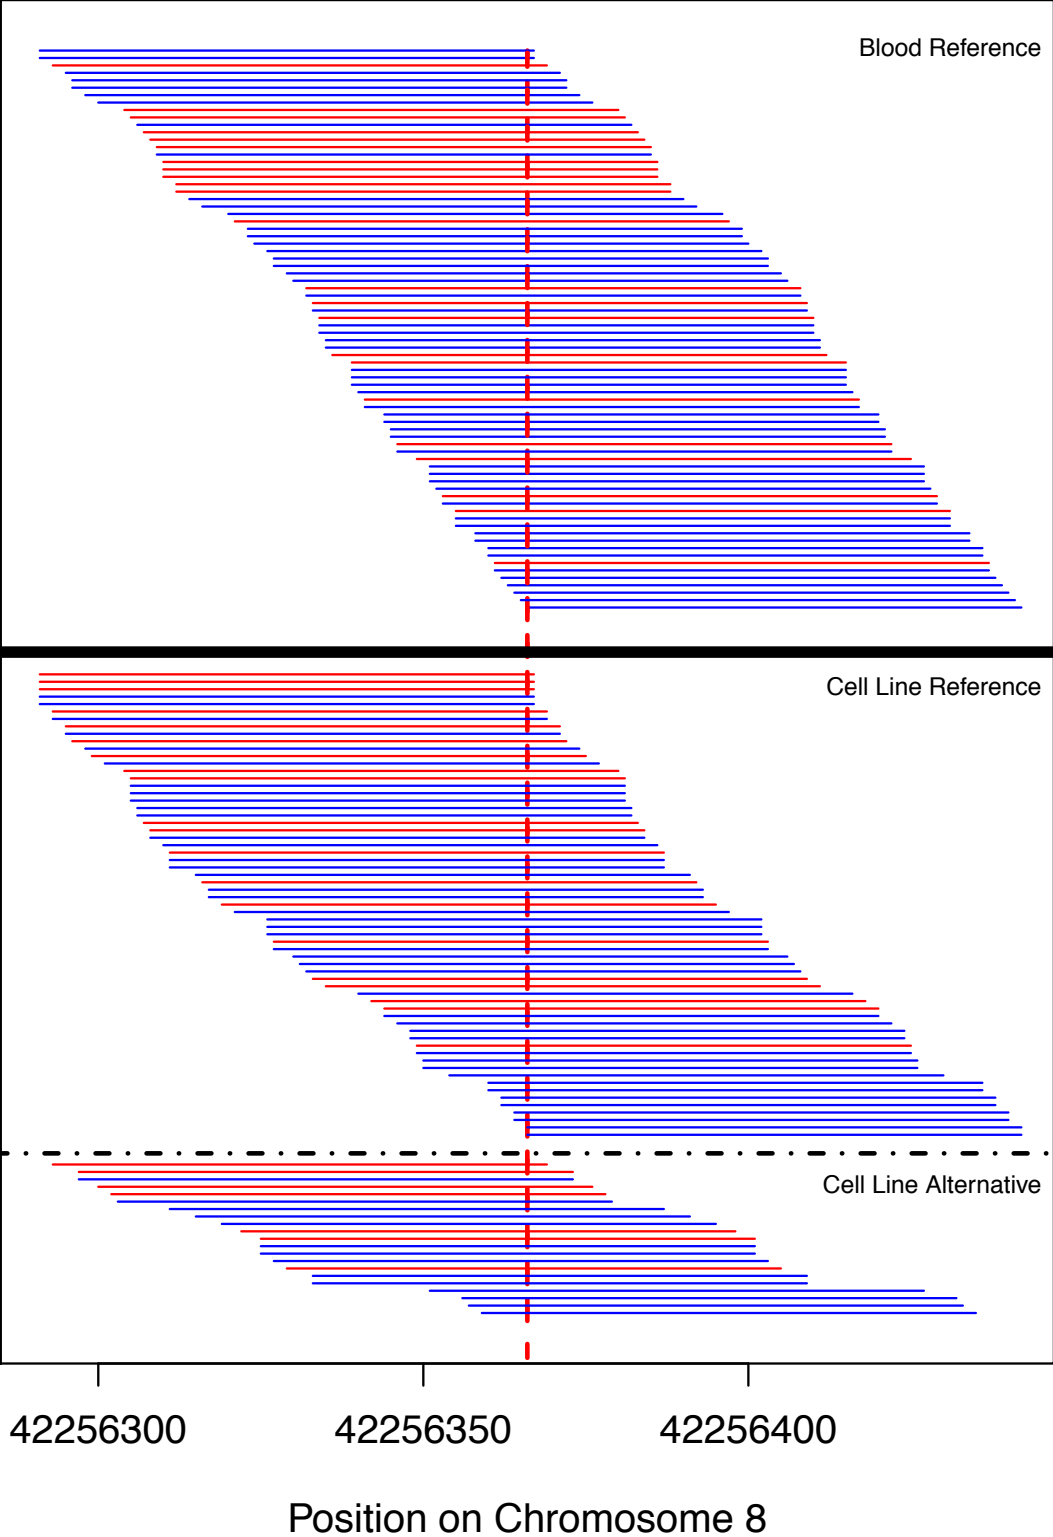

Individual: 12, Chromosome: 6, Position: 131188570

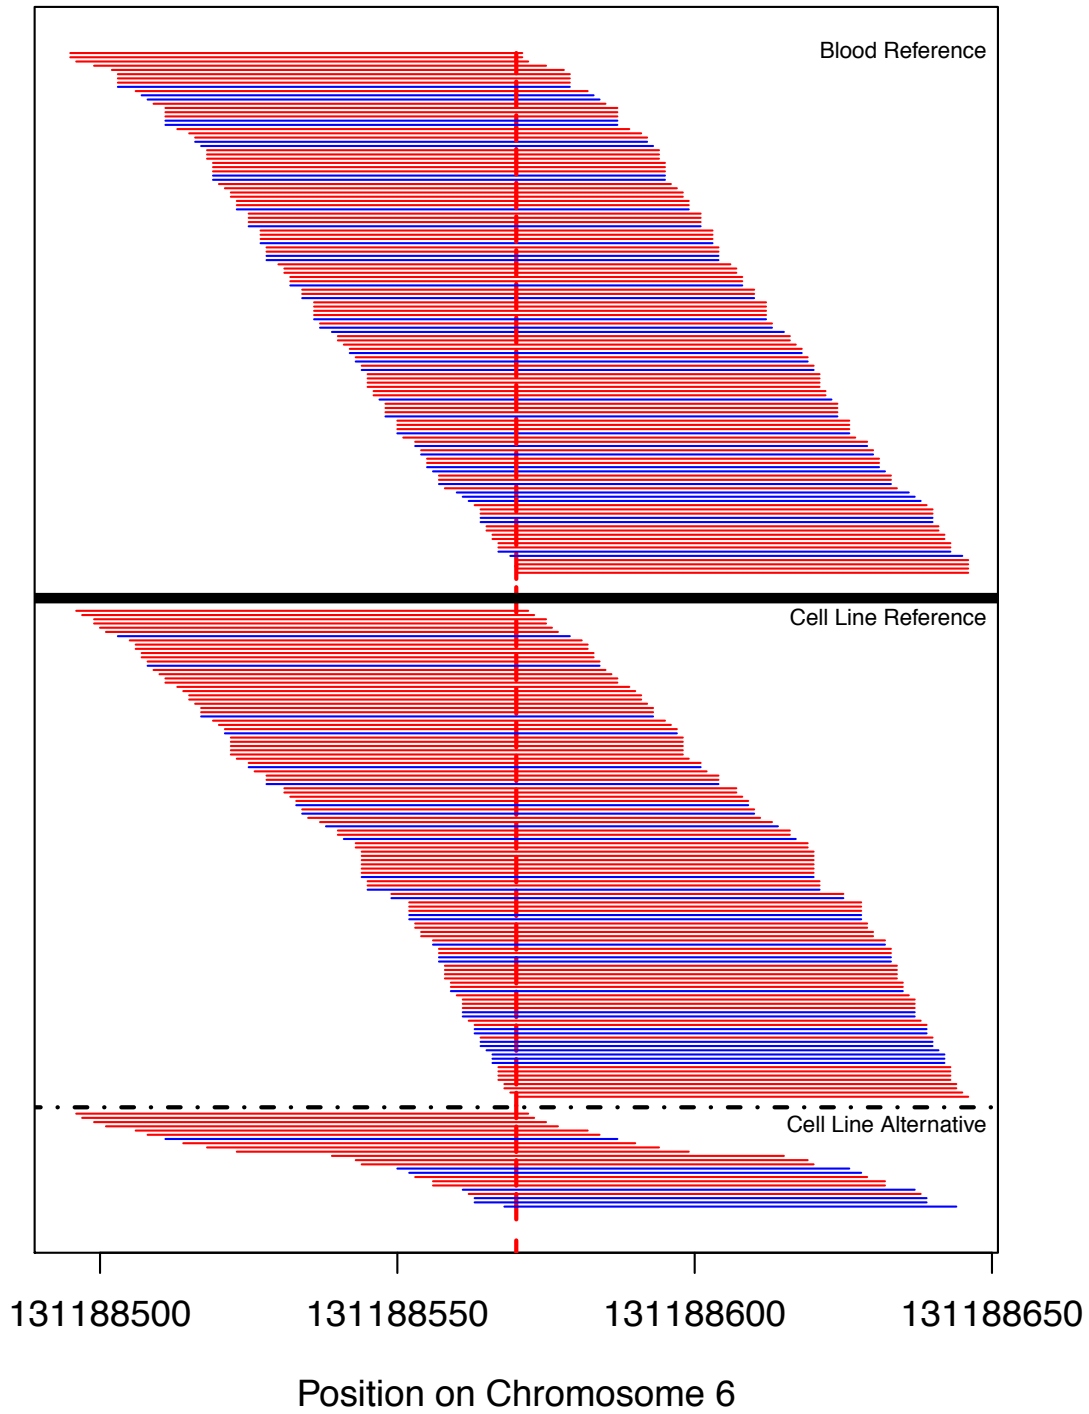

Individual: 12, Chromosome: 20, Position: 13846164

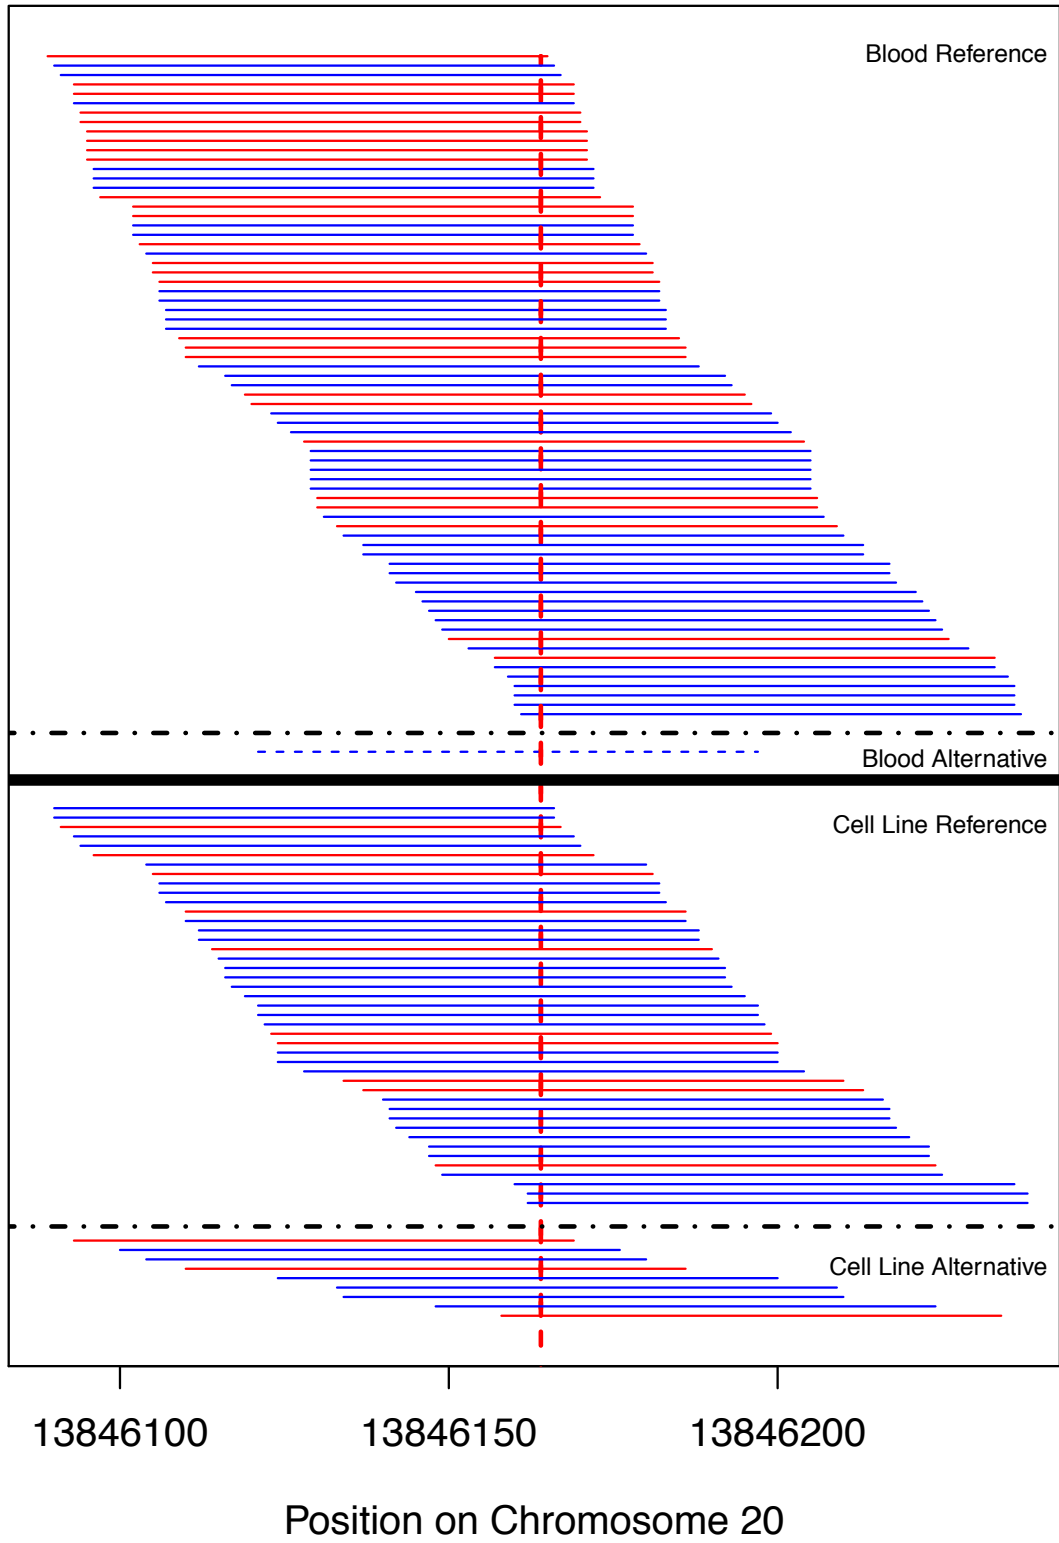



Individual: 16, Chromosome: 1, Position: 167403251

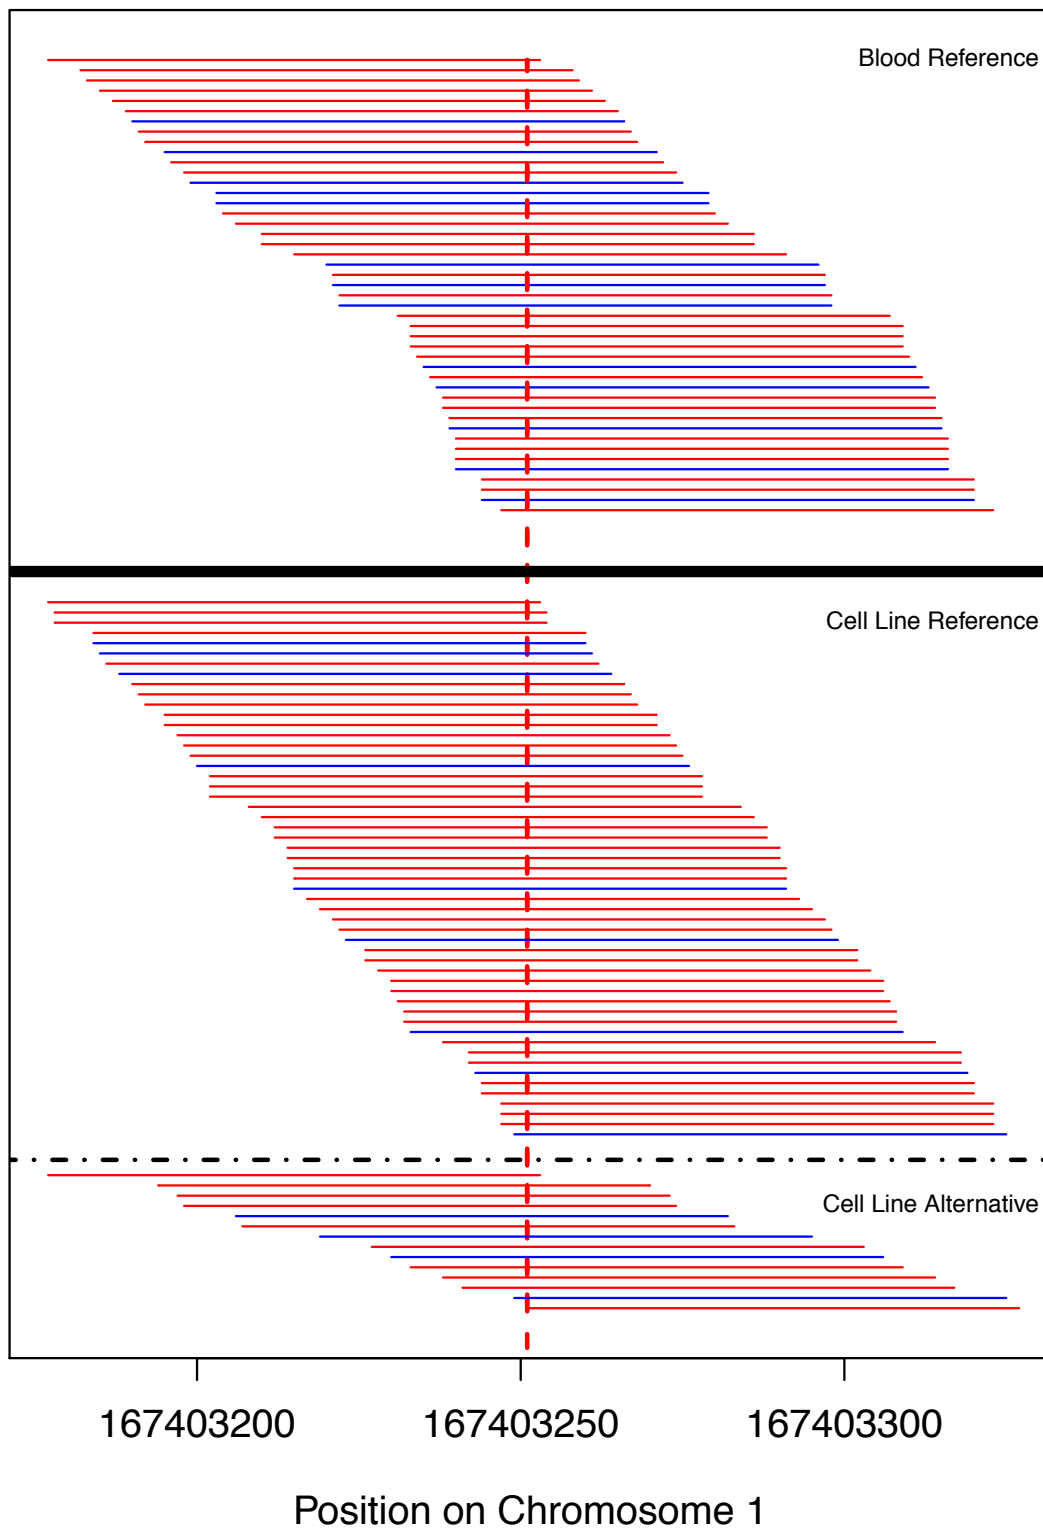

Individual: 16, Chromosome: 12, Position: 109684116

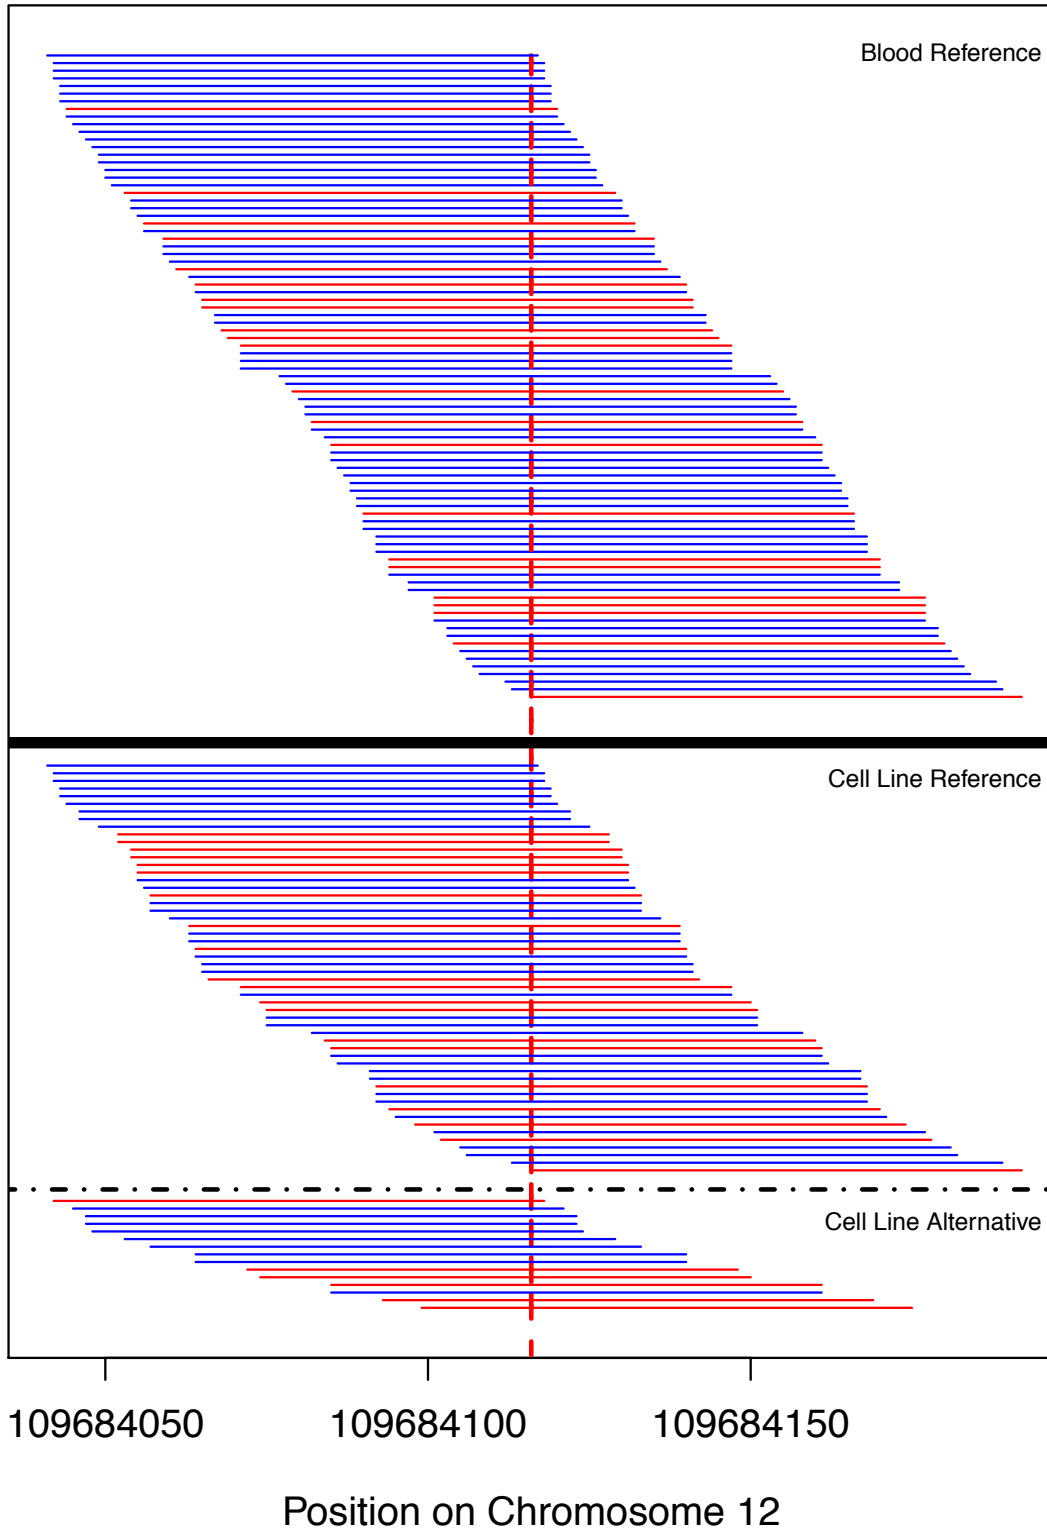

Individual: 16, Chromosome: 18, Position: 58038892

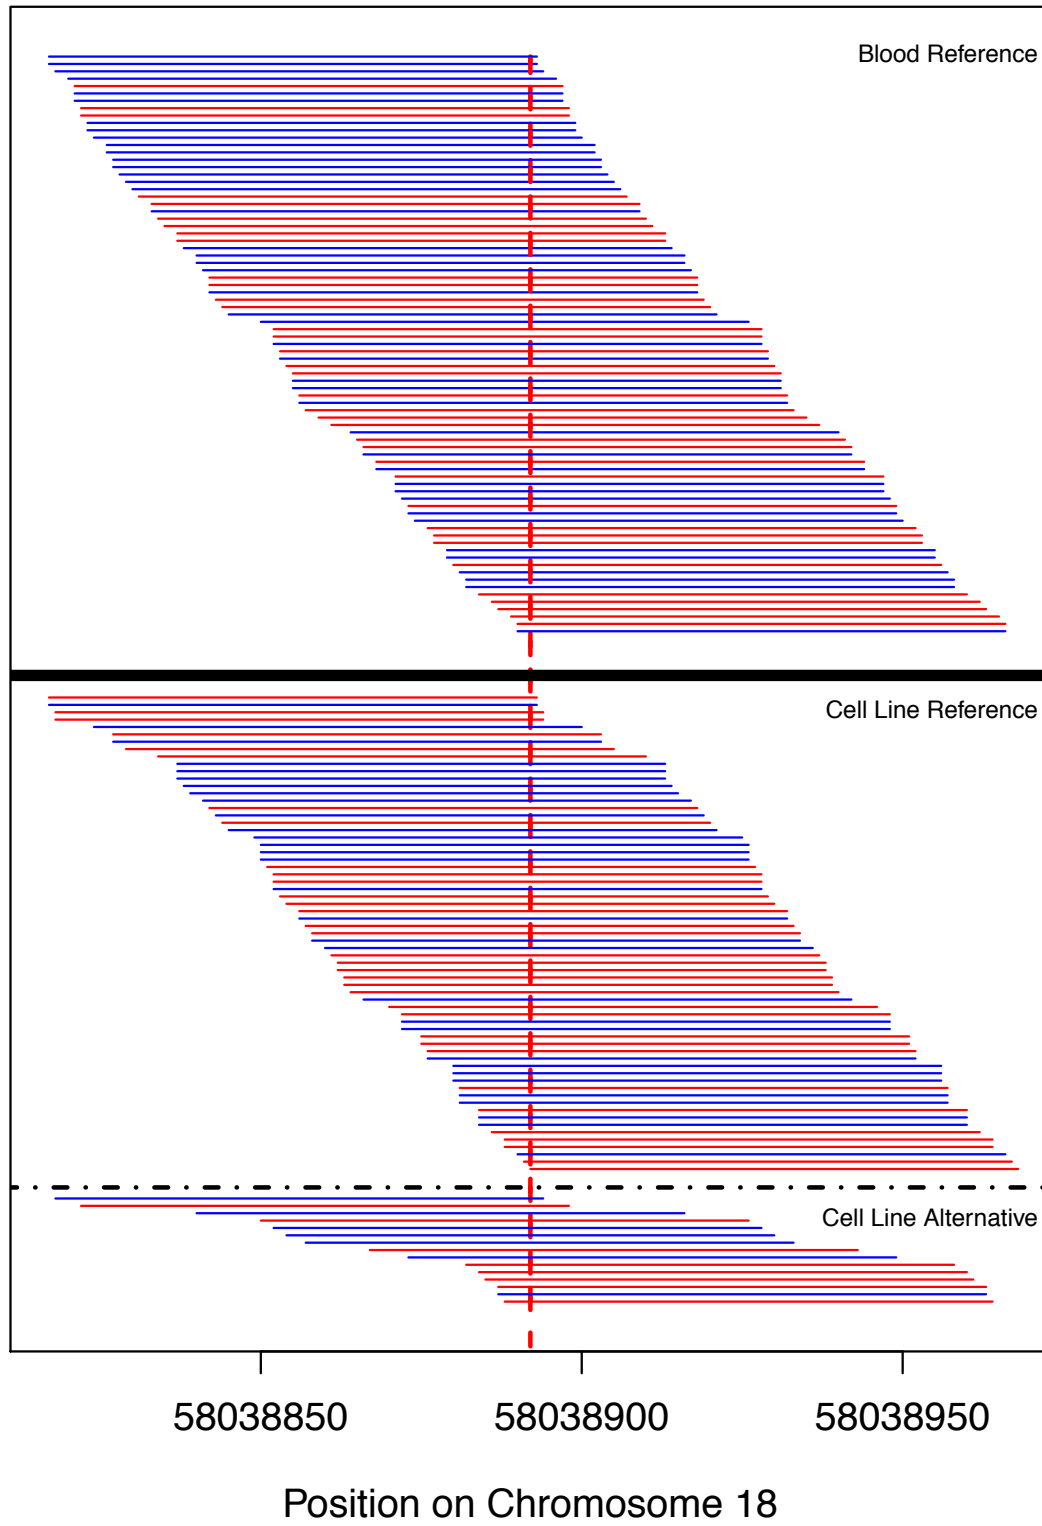

Individual: 11, Chromosome: 2, Position: 228882979

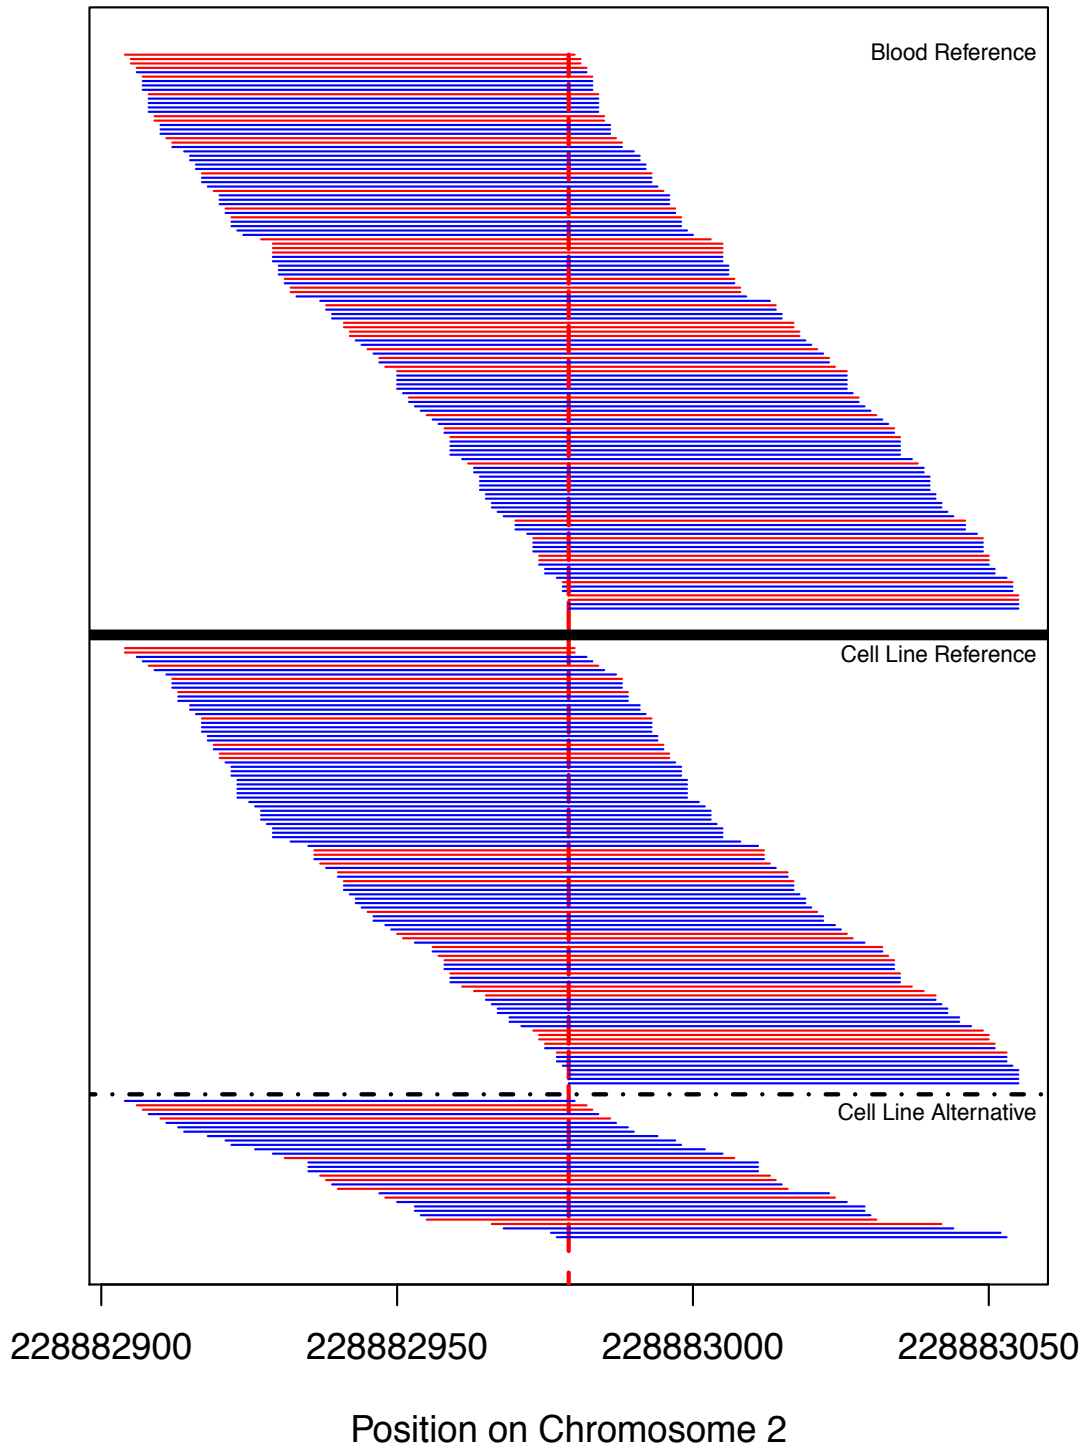

Supplement: NIHMS490775-supplement-02.pdf [file NIHMS490775-supplement-02.pdf]
