# Supplementary material
Source: PubMed Central journal article supplement (PMC3812417)
Supplement: NIHMS490775-supplement-01.pdf [file NIHMS490775-supplement-01.pdf]

## Filtering the Variant calls to identify the Candidates

The full text of the GATK call used for the MSSM sample is shown below. As our target is whole exome sequencing, we restricted analysis to variants in the Agilent Sure Select EXOME capture array by using the SureSelect\_All\_Exon\_G3362\_with\_names\_v2\_hg19.nochr.bed file.

The minimum mapping quality for a read to be included and the minimum base quality were both set at ten (Phred scale). This is a lenient threshold, allowing some lower quality reads to pass through, but this was motivated by the desire to avoid the possibility that blood/cell line disagreements (or mismatches) could be attributed to the use of too-stringent criteria at this stage.

Three initial filters were applied to the variant calls as follows:

1. The number of reads that covered the site was required to be at least 20 for both the blood and the cell line. Note that these counts exclude any reads that did not meet the quality thresholds described above.
2. The Phred-scaled likelihood for each of the calls was required to be larger than 30. The variant caller returns a set of three “likelihoods,” one for each of the three possible genotypes at the locus (homozygous reference, heterozygous, homozygous alternative), expressed relative to the best fit. Hence, the best fit will have a score of 0, the other two will be positive, with larger values indicating more confidence in the call.
3. Each call is assigned a label of either “pass” or “low quality” by the variant caller; those which are “low quality” are filtered.

Any candidate that does not pass all three of these tests is excluded from further consideration.

The final step taken was to apply the GATK Variant Recalibrator to detect low-quality calls. This method can be summarized as follows: Using sites which are known to hold common variants (e.g., they are present in HapMap) a Gaussian mixture model was trained on a suite of quality metrics. The motivation behind this approach is that most of these calls will be correct, and that they will largely be of high quality, hence the quality metrics at these sites are reflective of what one would expect of those that yield correct calls. This model was then applied to the entire set of calls, and a score (the Variant Quality Score Log Odds, or VQSLOD) is assigned to each. The VQSLOD is interpreted as the log odds ratio that a true variant exists versus no variant. The commands used for the MSSM sample are shown in the Supplementary Material.

## Results of Filtering

Table 1 summarizes the results of the preliminary calls. The second row gives the number of loci for which at least one of the sequences yielded a non-reference call. For instance, for the MSSM data, there are twelve variant call files (vcfs), two for each of the six subjects. There were 63,222 loci for which at least one of these twelve sequences was called a variant. This creates  $6 \times 63,222 = 379,332$  total blood/cell line pairs for which calls are made. (Calls are made even in the case the individual is homozygous reference.) Of these, 183,973 (48.5%) were such that either the blood or cell line call included a variant. This high percentage can be explained by the fact that many of these sites are common variants. Of these, 16,847 (9.2%) showed disagreement between the blood and cell line calls. The Vanderbilt subjects yielded similar percentages with 38,987 disagreements.

|                                                      | <b>MSSM</b> | <b>Vanderbilt</b> |
|------------------------------------------------------|-------------|-------------------|
| Number of Subjects                                   | 6           | 10                |
| Loci at which variant called on at least one subject | 63,222      | 75,232            |
| Blood or cell line called with non-reference base    | 183,973     | 327,728           |
| Number for which blood and cell line calls differ    | 16,847      | 38,987            |

**Table 1: Basic Properties of the Sample**

These  $16,847 + 38,987 = 55,834$  instances were then passed through the three first-level filters. Any candidate that did not pass all three of these tests was excluded from further consideration. There were 15,099 sites remaining after this step.

|                                                                    | <b>MSSM</b> | <b>Vanderbilt</b> |
|--------------------------------------------------------------------|-------------|-------------------|
| Number for which blood and cell line calls differed                | 16,847      | 38,987            |
| Number for which depth was at least 20 on both blood and cell line | 8,198       | 25,472            |
| Number for which Phred-scaled likelihood of both calls exceeds 30  | 3,883       | 13,131            |
| Number not characterized as “Low Quality” by GATK                  | 15,590      | 36,199            |

|                                          |       |        |
|------------------------------------------|-------|--------|
| Number that satisfied all three criteria | 3,294 | 11,805 |
|------------------------------------------|-------|--------|

**Table 2: Basic filters applied to the calls.**

A larger percentage of the Vanderbilt calls survive this filter, in large part because overall depth for the Vanderbilt subjects was higher, and hence there was more confidence in the calls. If the same filters are applied to the cases of blood/cell line agreement, there are 806,233 pairs remaining implying a preliminary 1.8% disagreement rate.

The standard approach to dealing with variants that exhibit problems such as strand bias is to filter the variants using the GATK Variant Calibrator. Although it relies on a six-dimensional Gaussian mixture fit to 6 quality variables, this model typically assigns low VQSLOD to those sites where QD is small and/or FS is large. After application of this technique, it is found that only 864 (5.7%) of the 15,099 candidates have a log odds larger than zero, i.e., the odds for being a true variant are better than even. Figure 3A displays the sites with VQSLOD greater than zero. Although most of the "suspect" sites are assigned VQSLOD scores below zero, it appears that cutting off VQSLOD at zero could be too generous. There were 407 sites for which VQSLOD exceeded 1.5. As a basis for comparison, among the 806,233 blood/cell line matches, 701,935 (87%) of the sites had VQSLOD larger than zero, and 692,586 (86%) had VQSLOD larger than 1.5.

Table 3 shows the progression of the decreasing number of mismatches as the filters are made more stringent, but also shows that there is an overall improvement in the quality of the matched calls as this filtering is applied. In particular, the Ti/Tv ratio for the heterozygote calls that did match between blood and cell line improved steadily from 2.33 up to 2.93.

| Stage                     | Number of Mismatches | Ti/Tv of Matched Heterozygote Calls |
|---------------------------|----------------------|-------------------------------------|
| Initial GATK Calls        | 55,834               | 2.33                                |
| After Basic Filters       | 15,099               | 2.48                                |
| After VQSLOD > 0 Filter   | 864                  | 2.92                                |
| After VQSLOD > 1.5 Filter | 407                  | 2.93                                |

**Table 3: Progression of number of mismatches and Ti/Tv ratio as filtering is made more stringent.**

## GATK Commands

The following is the command used to call the variants.

```
java -Xmx8g \
-jar GenomeAnalysisTK.jar \
-R human_g1k_v37.fasta \
-T UnifiedGenotyper \
```

```

-I 004ACL_markdup.bam \
-I 004AC_markdup.bam \
-I 007ACL_markdup.bam \
-I 007AC_markdup.bam \
-I 009ACL_markdup.bam \
-I 009A_markdup.bam \
-I 201ACL_markdup.bam \
-I 201AC_markdup.bam \
-I 8CL_markdup.bam \
-I 8_markdup.bam \
-I 9CL_markdup.bam \
-I 9_markdup.bam \
-L SureSelect_All_Exon_G3362_with_names_v2_hg19.nochr.bed \
-B:dbsnp,VCF dbsnp_132.b37.vcf \
-A AlleleBalance \
-A DepthOfCoverage \
-A FisherStrand \
-A LowMQ \
-A ReadPosRankSumTest \
-BTMR UNION \
-glm SNP \
-nt 7 \
-im ALL \
-gt_mode DISCOVERY \
-hets 0.001 \
-mmq 10 \
-stand_call_conf 20.0 -stand_emit_conf 10.0 -dcov 500 \
--min_base_quality_score 10 \
-l INFO \
-log MSSM_BloodCell.raw.log \
-o ./MSSM_BloodCell.raw.vcf

```

The following is the command used to construct the Gaussian mixture model.

```

java -Xmx8g \
-jar GenomeAnalysisTK.jar \
-T VariantRecalibrator \
-R human_g1k_v37.fasta \
-B:input,VCF ./MSSM_BloodCell.raw.vcf \
-B:dbsnp,VCF,known=true,training=false,truth=false,prior=8.0 \
  dbsnp_132.b37.vcf \
-B:hapmap,VCF,known=false,training=true,truth=true,prior=15.0 \
  hapmap_3.3.b37.vcf \
-B:omni,VCF,known=false,training=true,truth=false,prior=12.0 \
  1000G_omni2.5.b37.vcf \
-an QD \
-an HaplotypeScore \
-an MQRankSum \
-an ReadPosRankSum \
-an FS \
-an MQ \
-nt 8 \
--maxGaussians 6 \
-mode SNP \
-log ./MSSM_BloodCell.Recal.log \
-recalFile ./MSSM_BloodCell.Recal.recal \
-tranchesFile ./MSSM_BloodCell.Recal.tranches \
-rscriptFile ./MSSM_BloodCell.Recal.R

```

The following is the command used to apply the Gaussian mixture model to the observed variants, in order to obtain the VQSLOD scores.

```
java -Xmx8g \
-jar GenomeAnalysisTK.jar \
-T ApplyRecalibration \
-R human_g1k_v37.fasta \
-B:input,VCF ./MSSM_BloodCell.raw.vcf \
-recalFile ./MSSM_BloodCell.Recal.recal \
-tranchesFile ./MSSM_BloodCell.Recal.tranches \
-ts_filter_level 99.0 \
-log ./MSSM_BloodCell.ApplyRecal.log \
-o ./MSSM_BloodCell.Recal.vcf
```

## Detailed Validation Results

The following tables show the results of the validations. Note that not all of those in Group 3 were validated using Sanger sequencing. In almost all cases the homozygous case (WB or LCL) was homozygous for the reference allele; the exceptions are noted in the Comment column, and the homozygous call is shown in bold. All such instances appear in Groups 2 and 3.

| Indiv. | Chr. | Position  | Blood Call  | Validation | Cell Call   | Validation | Comment |
|--------|------|-----------|-------------|------------|-------------|------------|---------|
| 3      | X    | 90691093  | AAC[C/C]GCC | TRUE       | AAC[C/T]GCC | TRUE       | MOSAIC  |
| 6      | X    | 123538932 | CCT[C/C]TGC | TRUE       | CCT[C/T]TGC | TRUE       | MOSAIC  |
| 7      | 4    | 123533877 | TTC[A/A]CTT | TRUE       | TTC[A/G]CTT | TRUE       | MOSAIC  |
| 11     | 2    | 228882979 | ACC[G/G]TTG | TRUE       | ACC[G/A]TTG | TRUE       | MOSAIC  |
| 11     | 8    | 42256366  | AAA[T/T]CTC | TRUE       | AAA[T/A]CTC | TRUE       | MOSAIC  |
| 12     | 6    | 131188570 | GCT[C/C]GAA | TRUE       | GCT[C/T]GAA | TRUE       | MOSAIC  |
| 12     | 20   | 13846164  | CTG[T/T]ACA | TRUE       | CTG[T/G]ACA | TRUE       | MOSAIC  |
| 16     | 1    | 167403251 | AAC[A/A]CTC | TRUE       | AAC[A/G]CTC | TRUE       | MOSAIC  |
| 16     | 12   | 109684116 | CTG[C/C]GGG | TRUE       | CTG[C/T]GGG | TRUE       | MOSAIC  |
| 16     | 18   | 58038892  | TGC[C/C]GGG | TRUE       | TGC[C/T]GGG | TRUE       | MOSAIC  |

Table 4: Group 0 Validation Results

| Indiv. | Chr. | Position | Blood Call  | Validation | Cell Call   | Validation | Comment                   |
|--------|------|----------|-------------|------------|-------------|------------|---------------------------|
| 1      | 4    | 69180008 | GAC[G/G]AAG | TRUE       | GAC[G/A]AAG | TRUE       | MOSAIC                    |
| 4      | 1    | 10706375 | AGG[C/C]AAG | TRUE       | AGG[C/A]AAG | TRUE       | MOSAIC                    |
| 4      | 6    | 32629194 | AAC[G/G]CCA |            | AAC[G/A]CCA |            | Impossible primer design. |

|    |    |           |             |       |             |       |                                                                 |
|----|----|-----------|-------------|-------|-------------|-------|-----------------------------------------------------------------|
| 4  | 6  | 32629199  | CAC[T/T]CAG |       | CAC[T/C]CAG |       | Impossible primer design.                                       |
| 4  | 10 | 98078170  | CTT[C/C]AAG | TRUE  | CTT[C/T]AAG | FALSE | All "C" reads on forward strand.                                |
| 4  | 11 | 47644317  | CAT[C/C]CAC | TRUE  | CAT[C/A]CAC | TRUE  | MOSAIC                                                          |
| 4  | 11 | 56143156  | AGA[C/C]CAT | TRUE  | AGA[C/T]CAT | FALSE | Possibly an alignment problem? Note next candidate is adjacent. |
| 4  | 11 | 56143158  | ACC[A/A]TCA | TRUE  | ACC[A/G]TCA | FALSE | See previous.                                                   |
| 4  | 12 | 57662804  | CTG[C/C]TGG | TRUE  | CTG[C/G]TGG | FALSE | All "G" reads on the forward strand.                            |
| 4  | 12 | 77424135  | TAA[C/T]GAA | FALSE | TAA[C/C]GAA | TRUE  | Almost all reads on the reverse strand.                         |
| 4  | 22 | 50553671  | GAC[G/G]GAA | TRUE  | GAC[G/T]GAA | FALSE | All "T" reads on the reverse strand.                            |
| 4  | X  | 55249176  | GAA[G/G]CAG | TRUE  | GAA[G/A]CAG | TRUE  | MOSAIC                                                          |
| 5  | 11 | 67378012  | CCC[G/T]CCT | FALSE | CCC[G/G]CCT | TRUE  | All "T" reads on reverse strand.                                |
| 5  | 16 | 89246670  | GGA[T/T]GAG | TRUE  | GGA[T/C]GAG | FALSE | All but one "C" read is highly skewed.                          |
| 6  | X  | 99661793  | TCG[G/G]CCA | TRUE  | TCG[G/A]CCA | TRUE  | MOSAIC                                                          |
| 6  | X  | 118767373 | GGA[C/C]GAA | TRUE  | GGA[C/T]GAA | TRUE  | MOSAIC                                                          |
| 7  | 12 | 54803111  | GTG[C/C]GCC | TRUE  | GTG[C/T]GCC | TRUE  | MOSAIC                                                          |
| 7  | 20 | 210435    | ACT[C/C]CAA | TRUE  | ACT[C/T]CAA | TRUE  | MOSAIC                                                          |
| 8  | 5  | 137801559 | GAG[G/G]AGA | TRUE  | GAG[G/C]AGA | TRUE  | MOSAIC                                                          |
| 8  | 9  | 119106793 | CTC[C/C]TTC | TRUE  | CTC[C/T]TTC | TRUE  | MOSAIC                                                          |
| 9  | 2  | 198299652 | TTA[G/G]GCT | TRUE  | TTA[G/C]GCT | TRUE  | MOSAIC, but noisy background                                    |
| 9  | 11 | 134241679 | AAT[C/C]GTG | TRUE  | AAT[C/T]GTG | TRUE  | MOSAIC                                                          |
| 11 | 2  | 116599816 | ATC[T/T]GAG | TRUE  | ATC[T/G]GAG | TRUE  | MOSAIC                                                          |
| 11 | 7  | 72397315  | ACA[G/G]CTA | TRUE  | ACA[G/A]CTA | TRUE  | MOSAIC (very small additional peak)                             |
| 11 | 19 | 56300185  | TTA[A/A]GTA | TRUE  | TTA[A/G]GTA | TRUE  | MOSAIC                                                          |
| 12 | 11 | 27389932  | TTT[C/C]GGG | TRUE  | TTT[C/T]GGG | TRUE  | MOSAIC                                                          |
| 15 | 11 | 116797981 | AGC[T/T]TTT | TRUE  | AGC[T/C]TTT | TRUE  | MOSAIC                                                          |
| 16 | 11 | 18313224  | GTC[G/G]TTC | TRUE  | GTC[G/T]TTC | TRUE  | MOSAIC                                                          |

Table 5: Group 1 Validation Results

| Indiv. | Chr. | Position  | Blood Call  | Validation | Cell Call   | Validation | Comment                                                          |
|--------|------|-----------|-------------|------------|-------------|------------|------------------------------------------------------------------|
| 1      | 1    | 65313240  | GGG[T/T]CTA | TRUE       | GGG[T/G]CTA | FALSE      | All "G" reads on the forward strand, and these reads are skewed. |
| 1      | 3    | 122354873 | ACA[C/C]GAT | TRUE       | ACA[C/T]GAT | TRUE       | MOSAIC                                                           |
| 1      | 4    | 46264063  | GTC[C/C]ATG | TRUE       | GTC[C/A]ATG | FALSE      | Large total depth, and very few "A" reads on cell line.          |
| 1      | 9    | 135982045 | CTT[C/C]CCA | TRUE       | CTT[C/T]CCA | FALSE      | All "T" reads on the forward strand.                             |

|   |    |           |             |       |             |       |                                                                                                                                                                      |
|---|----|-----------|-------------|-------|-------------|-------|----------------------------------------------------------------------------------------------------------------------------------------------------------------------|
| 1 | 11 | 62378536  | CCG[C/A]CAC | FALSE | CCG[C/C]CAC | TRUE  | Blood "A" reads are skewed, and few.                                                                                                                                 |
| 1 | 12 | 132623810 | GAG[C/A]CCC | FALSE | GAG[C/C]CCC | TRUE  | Blood "A" reads are skewed, and few.                                                                                                                                 |
| 1 | 17 | 78931437  | GGT[G/G]GTG | TRUE  | GGT[G/T]GTG | FALSE | The forward "T" reads are skewed to the left, the reverse "T" reads are skewed to the right.                                                                         |
| 1 | 19 | 15278133  | TGG[T/T]GCC | TRUE  | TGG[T/G]GCC | FALSE | All "G" reads are on the forward strand.                                                                                                                             |
| 1 | 19 | 51958638  | AGG[T/T]GTG | TRUE  | AGG[T/G]GTG | FALSE | All "G" reads are on the forward strand.                                                                                                                             |
| 1 | 20 | 3928845   | GGG[A/A]AAA | TRUE  | GGG[A/G]AAA | FALSE | All but one "G" read is on the forward strand, and are highly skewed.                                                                                                |
| 1 | 20 | 61459302  | CCC[G/G]GAG | TRUE  | CCC[G/T]GAG | FALSE | The forward "T" reads are skewed to the left, the reverse "T" reads are skewed to the right.                                                                         |
| 1 | Y  | 14958873  | TCC[C/C]CAA | TRUE  | TCC[C/T]CAA | TRUE  | MOSAIC                                                                                                                                                               |
| 2 | 7  | 44613258  | CGA[G/G]CCA | TRUE  | CGA[G/T]CCA | FALSE | All "T" reads are skewed, and there are few.                                                                                                                         |
| 2 | 9  | 8484293   | TAT[G/G]ATT | TRUE  | TAT[G/T]ATT | FALSE | Low proportion of "T" reads on cell line, and almost all are skewed.                                                                                                 |
| 2 | 9  | 101498842 | TGG[C/A]ACT | FALSE | TGG[C/C]ACT | TRUE  | The forward "A" reads are skewed to the left, the reverse "A" reads are skewed to the right.                                                                         |
| 2 | 9  | 101498847 | CTG[C/A]TCT | FALSE | CTG[C/C]TCT | TRUE  | The forward "A" reads are skewed to the left, the reverse "A" reads are skewed to the right. Also, note proximity to previous.                                       |
| 2 | 18 | 63511013  | AAC[C/C]GGT | TRUE  | AAC[C/T]GGT | TRUE  | MOSAIC                                                                                                                                                               |
| 2 | 19 | 54725995  | GCT[A/A]TAG | FALSE | GCT[G/A]TAG | TRUE  | This appears to be a mosaic on both blood and cell line. Large imbalance in "A" versus "G" calls, but consistent between blood and cell line.<br><br>G is reference. |
| 2 | 21 | 35169715  | TGG[A/A]GCA | TRUE  | TGG[A/G]GCA | FALSE | All "G" reads are on the forward strand.                                                                                                                             |
| 2 | X  | 10107414  | AAT[C/C]AAT | TRUE  | AAT[C/A]AAT | FALSE | All "A" reads are on the forward strand.                                                                                                                             |
| 3 | 1  | 2441539   | TGA[G/G]GGA | TRUE  | TGA[G/A]GGA | FALSE |                                                                                                                                                                      |
| 3 | 1  | 27995021  | GTC[C/A]GAG | FALSE | GTC[C/C]GAG | TRUE  |                                                                                                                                                                      |
| 3 | 15 | 75970085  | GCA[G/T]CCT | FALSE | GCA[G/G]CCT | TRUE  |                                                                                                                                                                      |
| 3 | 17 | 33459447  | CTT[C/C]GGG | TRUE  | CTT[C/T]GGG | FALSE |                                                                                                                                                                      |
| 3 | 19 | 55148043  | GTC[T/T]GGG | TRUE  | GTC[T/C]GGG | FALSE |                                                                                                                                                                      |
| 3 | 21 | 33077817  | TTA[C/C]TTA | TRUE  | TTA[C/T]TTA | FALSE |                                                                                                                                                                      |

|   |    |           |             |      |             |       |         |
|---|----|-----------|-------------|------|-------------|-------|---------|
| 4 | 1  | 16748468  | CTC[T/T]GGA | TRUE | CTC[T/G]GGA | FALSE |         |
| 4 | 1  | 35870652  | TGG[A/A]GCC | TRUE | TGG[A/G]GCC | FALSE |         |
| 4 | 1  | 46499441  | TCC[A/A]GCT | TRUE | TCC[A/C]GCT | FALSE |         |
| 4 | 1  | 57398975  | CTT[C/C]CAC | TRUE | CTT[C/T]CAC | FALSE |         |
| 4 | 1  | 94461686  | TCC[A/A]GCA | TRUE | TCC[A/C]GCA | FALSE |         |
| 4 | 2  | 11780500  | CAG[T/T]TCC | TRUE | CAG[T/G]TCC | FALSE |         |
| 4 | 2  | 242204025 | TGG[A/A]CCA | TRUE | TGG[A/C]CCA | FALSE |         |
| 4 | 5  | 43173577  | GTT[C/C]TTA | TRUE | GTT[C/T]TTA | FALSE |         |
| 4 | 6  | 11735807  | CTG[A/A]TGT | TRUE | CTG[A/G]TGT | FALSE |         |
| 4 | 6  | 32632795  | CTC[C/C]GTC | TRUE | CTC[C/T]GTC | FALSE |         |
| 4 | 6  | 32632850  | GCG[G/G]GGA | TRUE | GCG[G/A]GGA | FALSE |         |
| 4 | 6  | 32634318  | TCG[C/C]CAG |      | TCG[C/A]CAG |       | Failure |
| 4 | 7  | 6461451   | CGT[T/T]GCA | TRUE | CGT[T/G]GCA | FALSE |         |
| 4 | 7  | 44151241  | CTG[T/T]GGG | TRUE | CTG[T/G]GGG | FALSE |         |
| 4 | 8  | 2020398   | GCC[C/C]TGA | TRUE | GCC[C/A]TGA | FALSE |         |
| 4 | 9  | 100315518 | CTG[T/T]TCC | TRUE | CTG[T/G]TCC | FALSE |         |
| 4 | 10 | 94822655  | TGG[A/A]CGA | TRUE | TGG[A/G]CGA | FALSE |         |
| 4 | 10 | 97397146  | TCC[A/A]CTG | TRUE | TCC[A/C]CTG | FALSE |         |
| 4 | 10 | 103772671 | CAG[T/T]AGC | TRUE | CAG[T/C]AGC | TRUE  | MOSAIC  |
| 4 | 11 | 68131385  | AGG[T/T]GCT | TRUE | AGG[T/G]GCT | FALSE |         |
| 4 | 11 | 116706900 | TCC[A/A]CCT | TRUE | TCC[A/C]CCT | FALSE |         |
| 4 | 13 | 21063460  | GGG[A/A]GAC | TRUE | GGG[A/G]GAC | FALSE |         |
| 4 | 14 | 23564357  | CTT[C/C]GGG | TRUE | CTT[C/T]GGG | FALSE |         |
| 4 | 14 | 23867949  | CAG[T/T]TGC | TRUE | CAG[T/G]TGC | FALSE |         |
| 4 | 14 | 54416937  | TGG[T/T]CAG | TRUE | TGG[T/C]CAG | FALSE |         |
| 4 | 14 | 57085352  | CCG[T/T]CCT | TRUE | CCG[T/G]CCT | FALSE |         |
| 4 | 16 | 2498902   | CTC[A/A]CGG | TRUE | CTC[A/C]CGG | FALSE |         |
| 4 | 16 | 4445265   | CCC[A/A]CCC | TRUE | CCC[A/C]CCC | FALSE |         |
| 4 | 17 | 7707597   | AGG[A/A]GCT | TRUE | AGG[A/G]GCT | FALSE |         |
| 4 | 17 | 21319369  | ACC[G/G]AGG | TRUE | ACC[G/A]AGG | FALSE |         |
| 4 | 19 | 313490    | CCC[A/A]CCT | TRUE | CCC[A/C]CCT | FALSE |         |
| 4 | 19 | 44252108  | CCC[T/T]CCT | TRUE | CCC[T/C]CCT | FALSE |         |
| 4 | 19 | 50322605  | GTG[A/A]ATG | TRUE | GTG[A/C]ATG | FALSE |         |
| 4 | 20 | 47592567  | CTC[A/A]CGG | TRUE | CTC[A/C]CGG | FALSE |         |



|    |    |           |             |       |             |       |                                       |
|----|----|-----------|-------------|-------|-------------|-------|---------------------------------------|
| 4  | 21 | 46640865  | AGC[T/T]GGG | TRUE  | AGC[T/G]GGG | FALSE |                                       |
| 5  | 3  | 179527471 | AAA[G/A]AAG | TRUE  | AAA[G/G]AAG | FALSE |                                       |
| 5  | 5  | 140079996 | TCC[A/C]AGC | FALSE | TCC[A/A]AGC | TRUE  |                                       |
| 5  | 5  | 148712424 | CAA[G/G]CCC | TRUE  | CAA[G/T]CCC | FALSE |                                       |
| 5  | 6  | 7405175   | TAT[C/C]ATT | TRUE  | TAT[C/A]ATT | FALSE |                                       |
| 5  | 7  | 66648157  | GAA[C/T]GTG | TRUE  | GAA[T/T]GTG | FALSE | C is reference                        |
| 5  | 11 | 117789342 | GCC[T/C]GGG | TRUE  | GCC[T/T]GGG | FALSE |                                       |
| 5  | 11 | 117789345 | TGG[G/C]CTG | TRUE  | TGG[G/G]CTG | FALSE |                                       |
| 5  | 15 | 43712957  | GGA[G/A]AAG | FALSE | GGA[G/G]AAG | TRUE  |                                       |
| 5  | 20 | 62658494  | CGG[G/A]AAG | FALSE | CGG[G/G]AAG | TRUE  |                                       |
| 6  | 6  | 32632598  | CGG[A/T]ACG |       | CGG[A/A]ACG |       | Failure                               |
| 6  | 16 | 135354    | GAG[G/T]ACA | FALSE | GAG[G/G]ACA | TRUE  |                                       |
| 6  | 22 | 24583727  | GTG[G/C]CAG | FALSE | GTG[G/G]CAG | TRUE  |                                       |
| 7  | 9  | 4663267   | CAC[C/C]ATC | TRUE  | CAC[C/A]ATC | TRUE  | MOSAIC                                |
| 7  | 9  | 72006567  | CTC[G/G]CGG | TRUE  | CTC[G/A]CGG | TRUE  | MOSAIC                                |
| 7  | 9  | 87425462  | TTT[G/G]TTT | TRUE  | TTT[G/A]TTT | TRUE  | MOSAIC                                |
| 7  | 10 | 15138591  | CGA[C/C]TTT | TRUE  | CGA[C/T]TTT | TRUE  | MOSAIC                                |
| 7  | 22 | 42912029  | CTT[G/G]GGA | TRUE  | CTT[G/T]GGA | FALSE |                                       |
| 8  | 1  | 54360125  | AGC[G/G]ACT | TRUE  | AGC[G/A]ACT | TRUE  | MOSAIC                                |
| 8  | 11 | 63672427  | GTG[A/C]CCC | TRUE  | GTG[A/A]CCC | FALSE |                                       |
| 8  | 20 | 10036141  | TTT[C/T]TTT | TRUE  | TTT[C/C]TTT | FALSE |                                       |
| 9  | 2  | 130912789 | CAA[A/A]CAA | TRUE  | CAA[A/C]CAA | FALSE |                                       |
| 9  | 5  | 840785    | GAG[C/A]CAC | TRUE  | GAG[C/C]CAC | FALSE |                                       |
| 9  | 6  | 75823294  | CAT[G/G]TGC | TRUE  | CAT[G/A]TGC | TRUE  | MOSAIC                                |
| 9  | 11 | 2416725   | AGG[C/C]TGT | TRUE  | AGG[C/A]TGT | FALSE |                                       |
| 9  | 15 | 48459567  | ATC[C/C]TTA | TRUE  | ATC[C/T]TTA | TRUE  | MOSAIC                                |
| 10 | 1  | 68942568  | CTT[C/T]ATT | TRUE  | CTT[C/C]ATT | FALSE |                                       |
| 10 | 5  | 60241142  | GAA[A/A]GAG | TRUE  | GAA[G/A]GAG | FALSE | G is reference                        |
| 10 | 7  | 128483043 | TGC[A/C]CCT | TRUE  | TGC[A/A]CCT | FALSE |                                       |
| 10 | 10 | 3174669   | CTC[A/A]CCG |       | CTC[A/C]CCG |       | Failure                               |
| 10 | 19 | 46375892  | GCC[A/A]GAA | TRUE  | GCC[A/G]GAA | FALSE |                                       |
| 11 | 1  | 12921127  | ATT[A/G]GAA | TRUE  | ATT[A/A]GAA | FALSE | All G calls are in a single direction |
| 11 | 2  | 139318349 | AAC[A/A]TTT | TRUE  | AAC[A/T]TTT | FALSE | All T calls are in a single direction |
| 11 | 3  | 48464209  | AAG[C/C]GAT | TRUE  | AAG[C/T]GAT | TRUE  | MOSAIC                                |

|    |    |           |             |       |             |       |                                       |
|----|----|-----------|-------------|-------|-------------|-------|---------------------------------------|
| 12 | 3  | 100091564 | GCG[G/T]TAC | FALSE | GCG[G/G]TAC | TRUE  | All T calls are in a single direction |
| 12 | 4  | 155506864 | CAC[G/G]GGA | TRUE  | CAC[G/A]GGA | TRUE  | MOSAIC                                |
| 12 | 10 | 117825111 | GCC[C/C]GAC | TRUE  | GCC[C/T]GAC | TRUE  | All T calls are in a single direction |
| 12 | 19 | 33467325  | TTC[A/A]TTG | TRUE  | TTC[A/G]TTG | TRUE  | MOSAIC                                |
| 13 | 17 | 21318770  | CGC[G/A]GCG | FALSE | CGC[G/G]GCG | TRUE  | All A calls are in a single direction |
| 13 | 17 | 21318773  | GGC[G/A]CAG | FALSE | GGC[G/G]CAG | TRUE  | All A calls are in a single direction |
| 14 | 7  | 26251843  | GTT[C/T]TTT | FALSE | GTT[C/C]TTT | TRUE  | Very slight bump for T on blood       |
| 14 | 15 | 20588693  | CAA[C/C]ATC | FALSE | CAA[C/T]ATC | TRUE  | Appears to be mosaic on both          |
| 15 | 14 | 96180232  | AAG[C/C]TCC | TRUE  | AAG[C/T]TCC | FALSE | All T calls are in a single direction |
| 16 | 3  | 48505302  | GGC[A/A]TCT | TRUE  | GGC[A/G]TCT | FALSE | No clear explanation for mistake      |
| 16 | 6  | 151334926 | TGG[T/T]GTT | TRUE  | TGG[T/G]GTT | FALSE | All G calls are in a single direction |
| 16 | 11 | 19251484  | TGG[T/T]TTG | TRUE  | TGG[T/G]TTG | TRUE  | MOSAIC                                |
| 16 | 14 | 81223208  | ACA[A/A]TAA | TRUE  | ACA[A/C]TAA | FALSE | All C calls are in a single direction |

**Table 6: Group 2 Validation Results**

| Indiv. | Chr. | Position  | Blood Call  | Validation | Cell Call       | Validation | Comment                                     |
|--------|------|-----------|-------------|------------|-----------------|------------|---------------------------------------------|
| 1      | 7    | 44099733  | TGC[C/C]CTG | TRUE       | TGC[C/A]CTG     | FALSE      | Strong Candidate                            |
| 1      | 20   | 1895794   | CGT[G/G]TTG |            | CGT[G/A]TTG     |            | Strong Candidate; Failure                   |
| 1      | 20   | 1895797   | GTT[G/G]GTT |            | GTT[G/A]GTT     |            | Strong Candidate; Failure                   |
| 2      | 1    | 185137463 | TAT[T/T]TAT |            | TAT[T/A]TAT     |            | Strong Candidate; Failure                   |
| 2      | 3    | 16264288  | AGA[G/G]CCT | TRUE       | AGA[G/T]CCT     | FALSE      | Strong Candidate                            |
| 2      | 7    | 912157    | CAC[G/G]TAT | TRUE       | CAC[G/T]TAT     | FALSE      | Strong Candidate                            |
| 2      | 8    | 73480055  | TCC[G/G]GAG | TRUE       | TCC[G/A]GAG     | FALSE      | Strong Candidate                            |
| 3      | 1    | 240371031 | AGC[A/A]GGA |            | AGC[A/G]GG<br>A |            | Strong Candidate; Failure                   |
| 4      | 5    | 115230799 | ACA[T/T]TAG | TRUE       | ACA[T/A]TAG     | FALSE      | Strong Candidate                            |
| 4      | 5    | 115230800 | CAT[T/T]AGA | TRUE       | CAT[T/C]AGA     | FALSE      | Strong Candidate                            |
| 4      | 6    | 32712996  | AGT[A/A]CAC | TRUE       | AGT[A/T]CAC     | FALSE      | Strong Candidate                            |
| 4      | X    | 154721357 | AAA[C/C]AGA |            | AAA[G/C]AGA     |            | Strong Candidate; Failure<br>G is reference |
| 5      | 6    | 148861617 | CTC[G/G]TTG | TRUE       | CTC[G/A]TTG     | TRUE       | Strong Candidate; MOSAIC                    |
| 6      | 19   | 51919894  | CAC[A/A]CCC | TRUE       | CAC[A/G]CCC     | FALSE      | Strong Candidate                            |
| 7      | 19   | 54942009  | CAG[C/C]GAG |            | CAG[C/A]GAG     |            | Strong Candidate; Failure                   |
| 8      | 12   | 51740409  | CCA[T/T]AAA |            | CCA[T/G]AAA     |            | Strong Candidate; Failure                   |
| 8      | 12   | 51740410  | CAT[A/A]AAG |            | CAT[A/G]AAG     |            | Strong Candidate; Failure                   |
| 9      | 6    | 32609368  | CTT[A/A]AGT |            | CTT[A/G]AGT     |            | Strong Candidate; Failure                   |

|    |    |           |             |       |             |       |                                                |
|----|----|-----------|-------------|-------|-------------|-------|------------------------------------------------|
| 9  | 8  | 28651299  | CAA[A/A]AAA | TRUE  | CAA[A/C]AAA | FALSE | Strong Candidate                               |
| 11 | 2  | 27840357  | TGG[A/G]AAA | FALSE | TGG[A/A]AAA | TRUE  |                                                |
| 11 | 3  | 10114944  | GAA[A/C]CAA | FALSE | GAA[A/A]CAA | TRUE  |                                                |
| 11 | 5  | 180335598 | AGG[T/T]GTT | TRUE  | AGG[T/G]GTT | FALSE |                                                |
| 12 | 4  | 72319317  | CAT[T/T]TAT | TRUE  | CAT[T/G]TAT | TRUE  | Strong Candidate;<br>MOSAIC                    |
| 12 | 16 | 88926388  | GCC[C/C]TAC | TRUE  | GCC[C/T]TAC | FALSE |                                                |
| 16 | 1  | 15808767  | TCC[G/G]GGA |       | TCC[G/A]GGA |       | Strong Candidate;<br>Failure                   |
| 16 | 1  | 202743892 | ATC[T/T]CAT | TRUE  | ATC[T/C]CAT | FALSE |                                                |
| 16 | 5  | 120022221 | GAT[T/T]CCT | TRUE  | GAT[T/C]CCT | TRUE  | Strong Candidate;<br>MOSAIC                    |
| 16 | 7  | 99361466  | GTA[T/T]CAT | TRUE  | GTA[C/T]CAT | FALSE | C is reference                                 |
| 16 | 8  | 7718187   | AAT[T/G]AGA | TRUE  | AAT[G/G]AGA | FALSE | T is reference                                 |
| 16 | 8  | 87229948  | CGA[A/A]GAT |       | CGA[T/A]GAT |       | Strong Candidate;<br>Failure<br>T is reference |
| 16 | 9  | 135153668 | CAA[T/T]AGT | TRUE  | CAA[C/T]AGT | FALSE | C is reference                                 |
| 16 | 19 | 52249211  | AAC[G/G]CCA | TRUE  | AAC[T/G]CCA | FALSE | Strong Candidate<br>T is reference             |
| 16 | 21 | 15516948  | TTT[T/T]TGG | TRUE  | TTT[C/T]TGG | FALSE | C is reference                                 |

Table 7: Group 3 Validation Results
